# Supplementary material for: Mono- and di-bromo platinum(iv) prodrugs via oxidative bromination: synthesis, characterization, and cytotoxicity
Source: Royal Society of Chemistry journal article supplement (doi:10.1039/c5dt03101j), 2015-01-01
Supplement: c5dt03101j1.pdf [file c5dt03101j1.pdf]

Supporting Information for

**Mono- and Di-bromo Platinum(IV) Prodrugs via Oxidative  
Bromination: Synthesis, Characterization, and Cytotoxicity**

Zoufeng Xu, Zhigang Wang, Shek-Man Yiu, and Guangyu Zhu

**Contents**

- Figures S1-S3.** NMR and ESI-MS spectrum of compound **1**  
**Figures S4-S7.** NMR and ESI-MS spectrum of compound **2**  
**Figures S8-S11.** NMR and ESI-MS spectrum of compound **3**  
**Figures S12-S15.** NMR and ESI-MS spectrum of compound **4**  
**Figures S16-S19.** NMR and ESI-MS spectrum of compound **5**  
**Figures S20-S23.** NMR and ESI-MS spectrum of compound **6**  
**Figures S24-S27.** NMR and ESI-MS spectrum of compound **7**  
**Figures S28-S31.** NMR and ESI-MS spectrum of compound **8**  
**Figures S32-S34.** NMR and ESI-MS spectrum of compound **9**  
**Figures S35-S38.** NMR and ESI-MS spectrum of compound **10**  
**Figures S39-S42.** NMR and ESI-MS spectrum of compound **11**  
**Figure S43.** Packing diagram of compound **2**  
**Figure S44.** Packing diagram of compound **11**  
**Figures S45-S51.** Cyclic voltammetry of compounds **2,3,6,9,10,11,13**  
**Figure S52.** Hydrolysis of compound **6** in D<sub>2</sub>O  
**Table S1.** Crystal data and structure refinement for compounds **2** and **11**  
**Table S2.** Selected bond lengths (Å) and angles (°) for compound **2**  
**Table S3.** Selected bond lengths (Å) and angles (°) for compound **11**

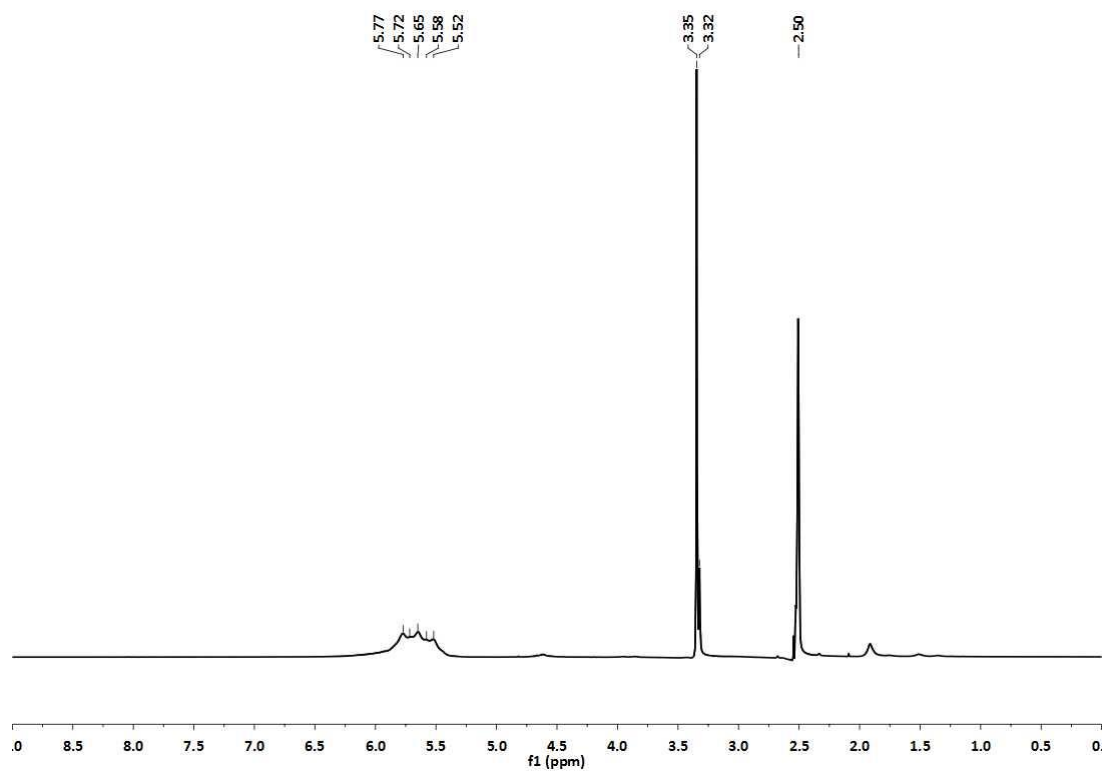

Figure S1.  $^1\text{H}$  NMR spectrum of **1** in  $\text{DMSO-}d_6$ .

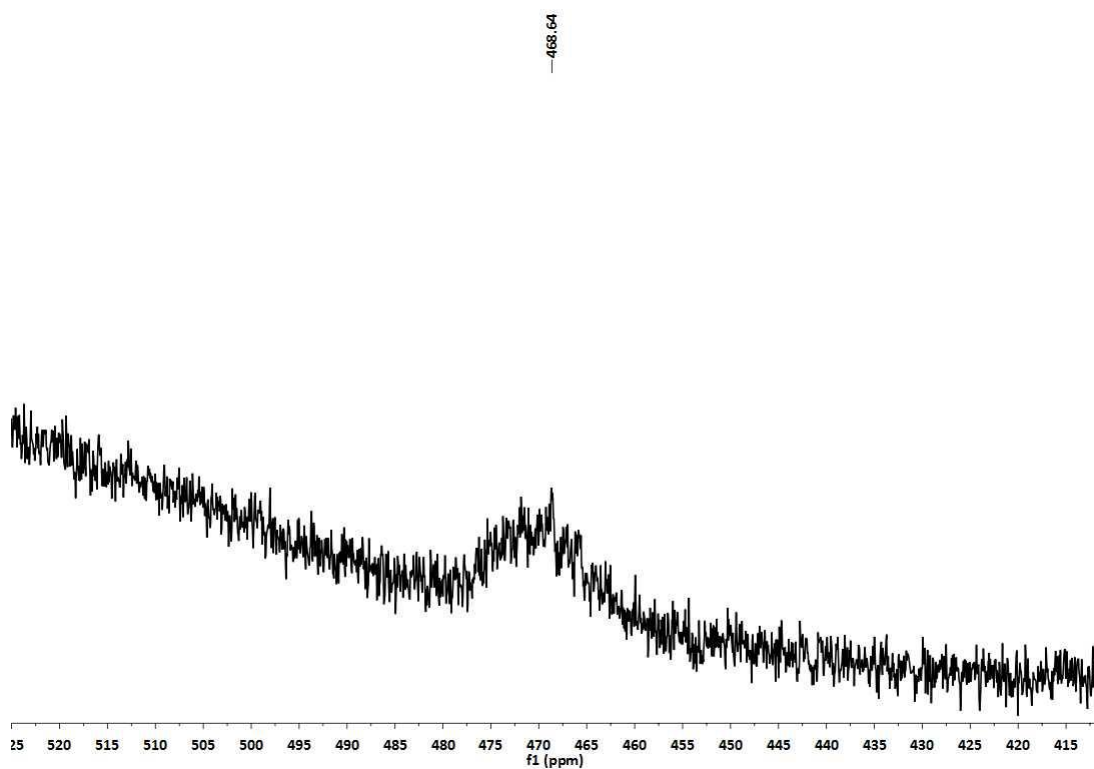

Figure S2.  $^{195}\text{Pt}$  NMR spectrum of **1** in  $\text{DMSO-}d_6$ .

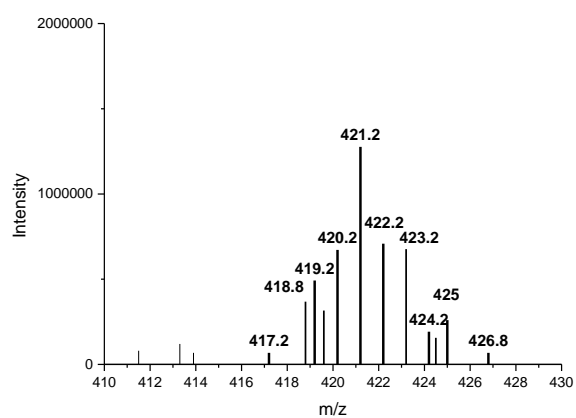

Figure S3. ESI-MS spectrum of 1.

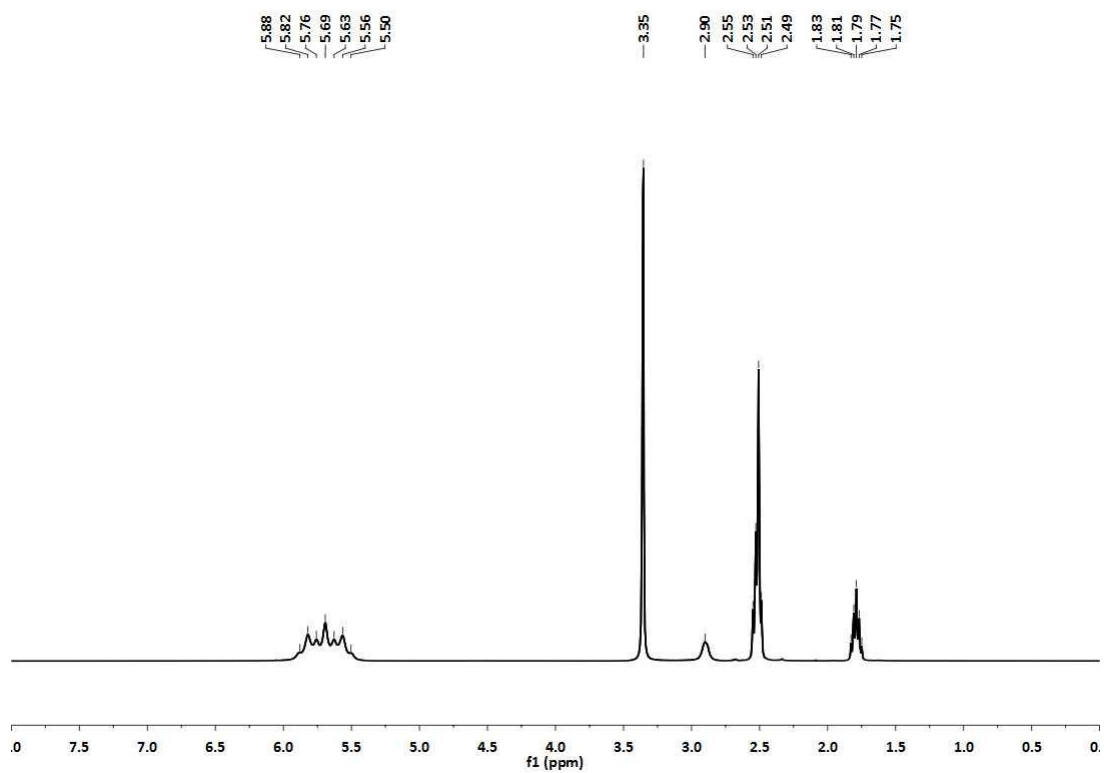

Figure S4. <sup>1</sup>H NMR spectrum of 2 in DMSO-*d*<sub>6</sub>.

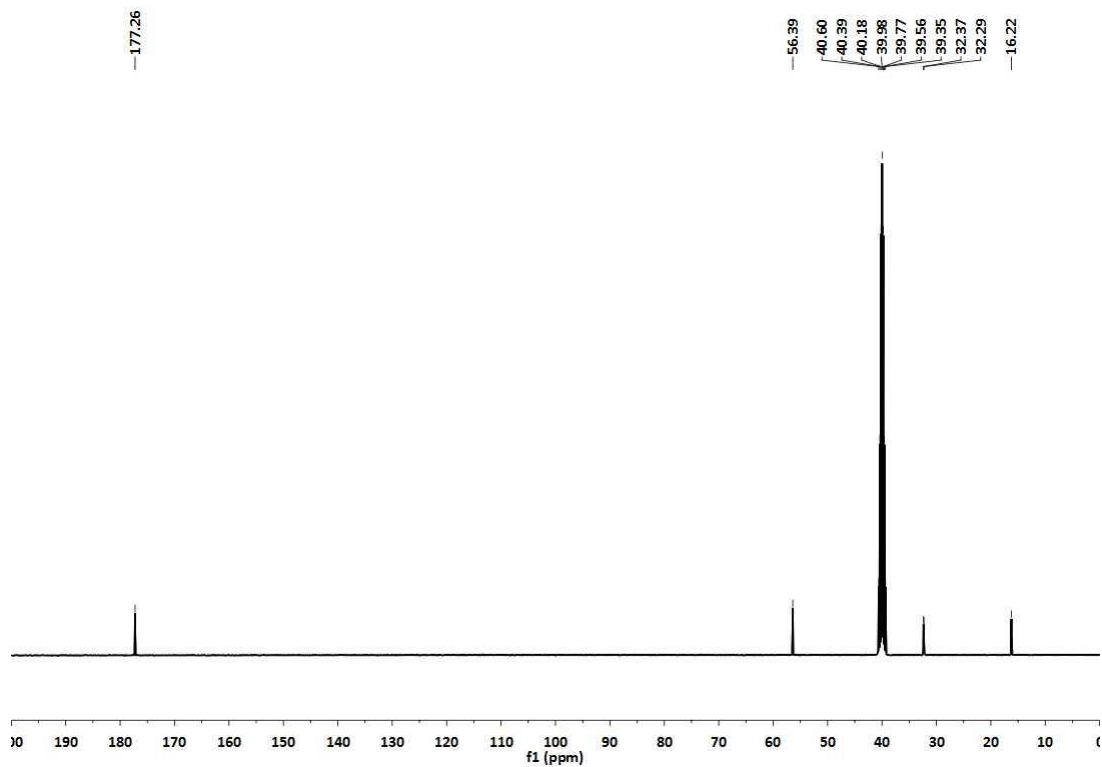

Figure S5.  $^{13}\text{C}$  NMR spectrum of **2** in  $\text{DMSO-}d_6$ .

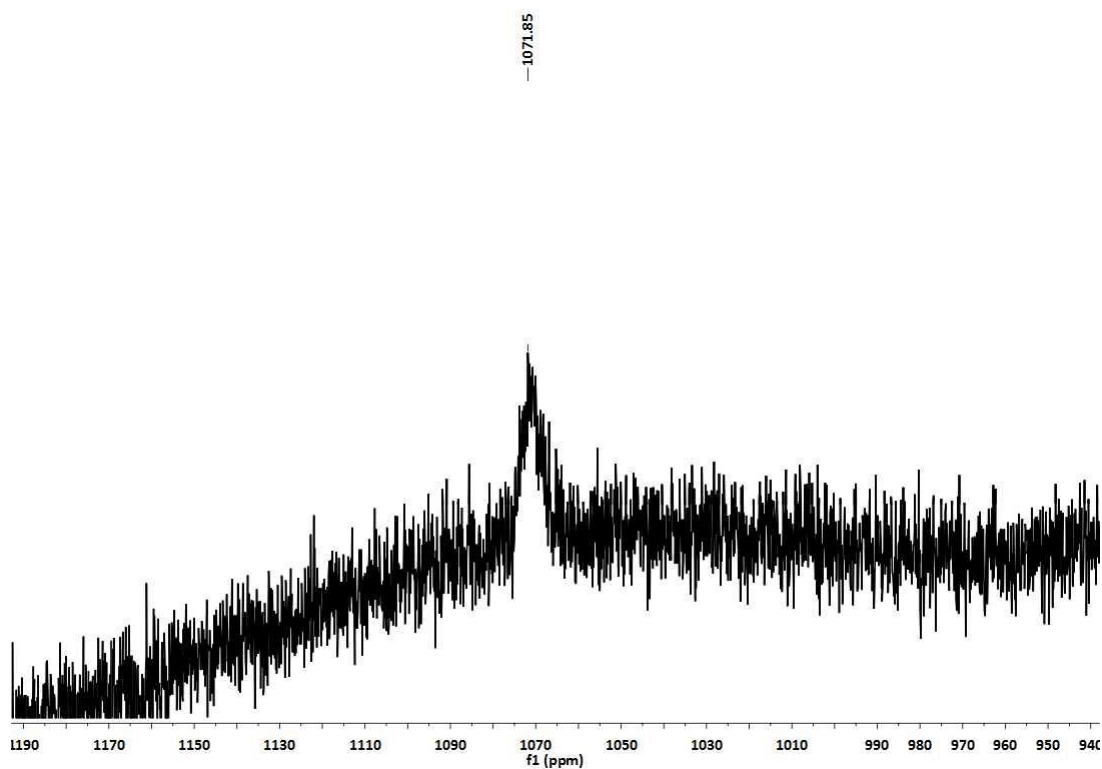

Figure S6.  $^{195}\text{Pt}$  NMR spectrum of **2** in  $\text{DMSO-}d_6$ .

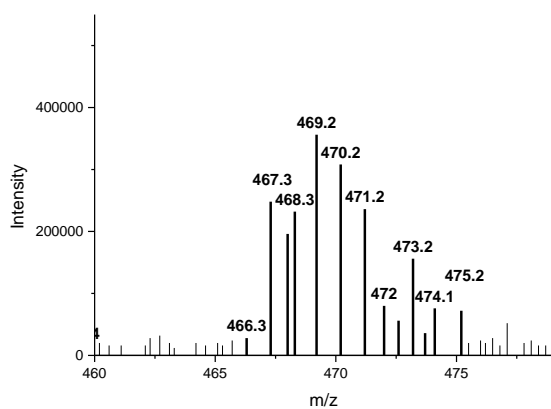

**Figure S7.** ESI-MS spectrum of **2**.

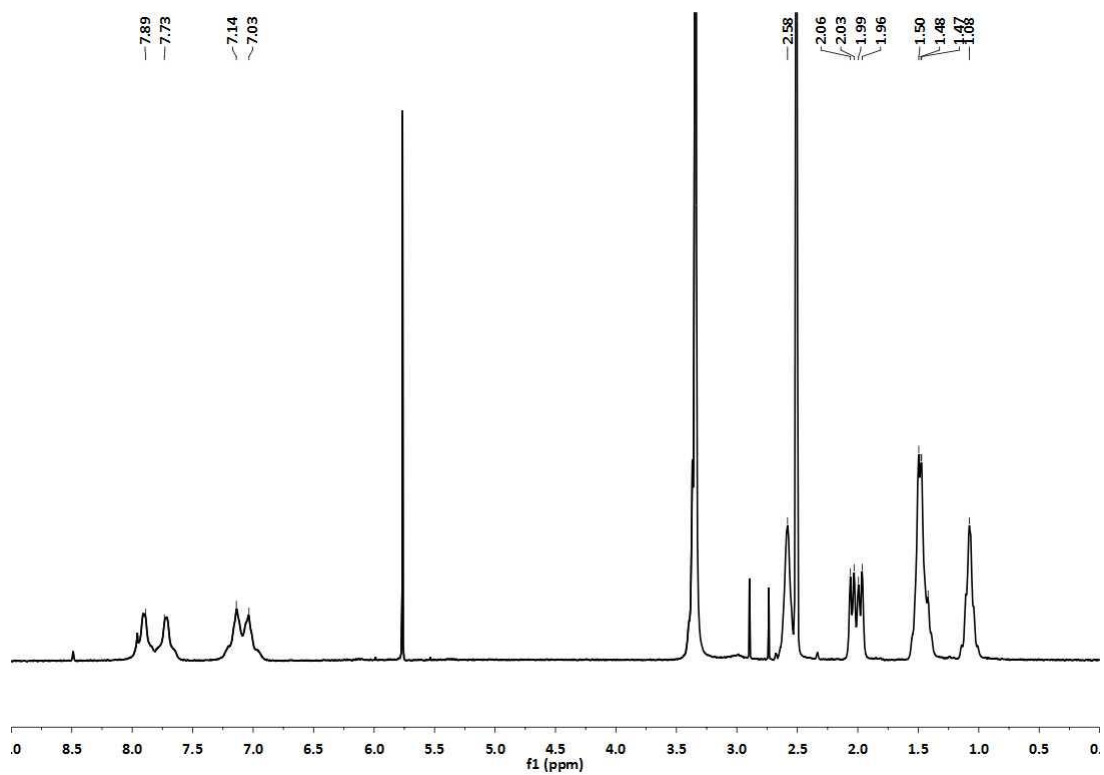

**Figure S8.**  $^1\text{H}$  NMR spectrum of **3** in  $\text{DMSO-}d_6$ .

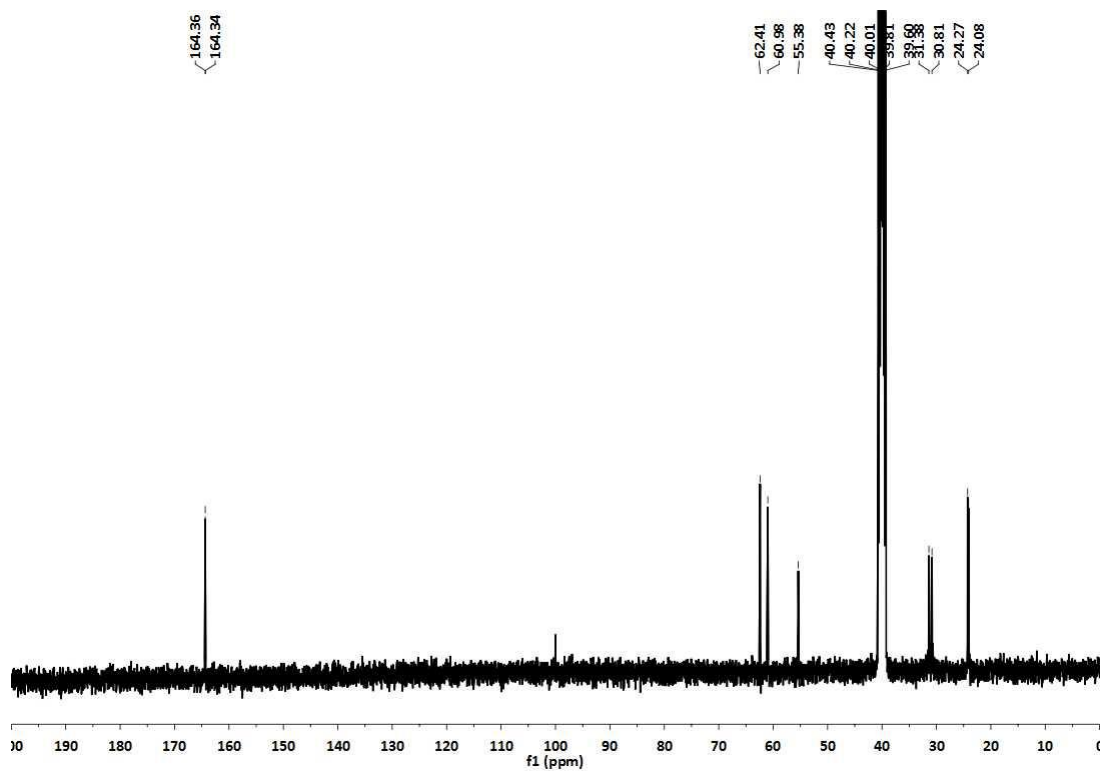

Figure S9. <sup>13</sup>C NMR spectrum of **3** in DMSO-*d*<sub>6</sub>.

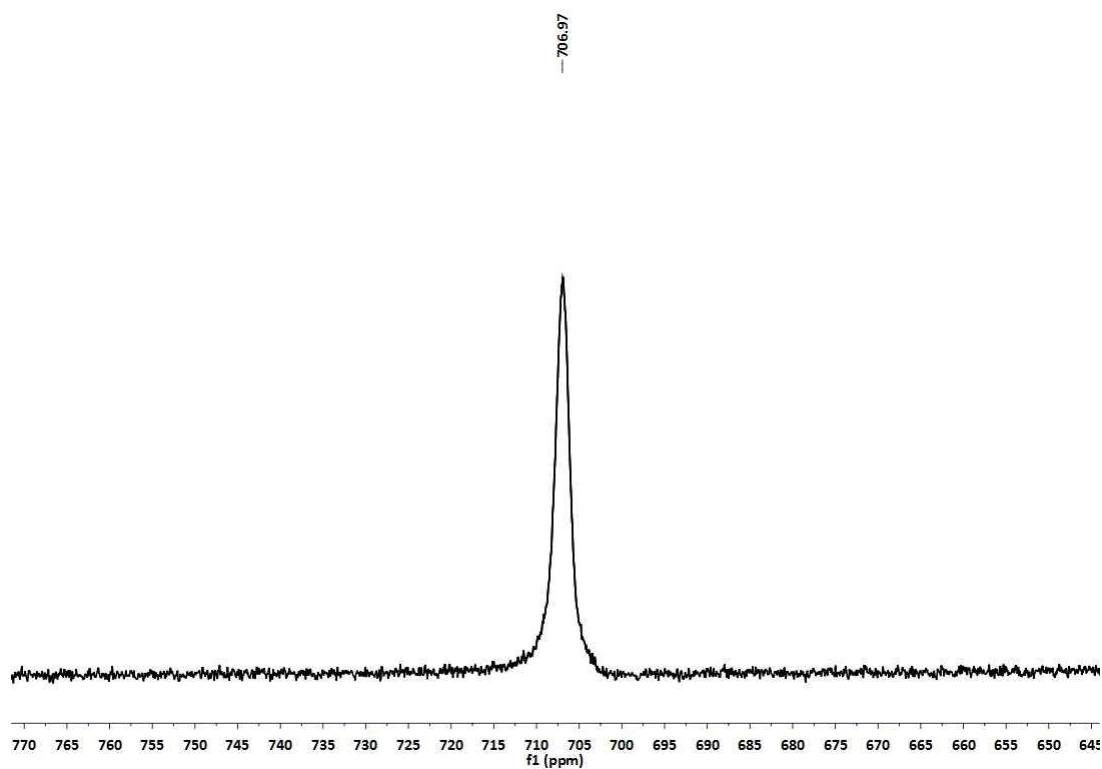

Figure S10. <sup>195</sup>Pt NMR spectrum of **3** in DMSO-*d*<sub>6</sub>.

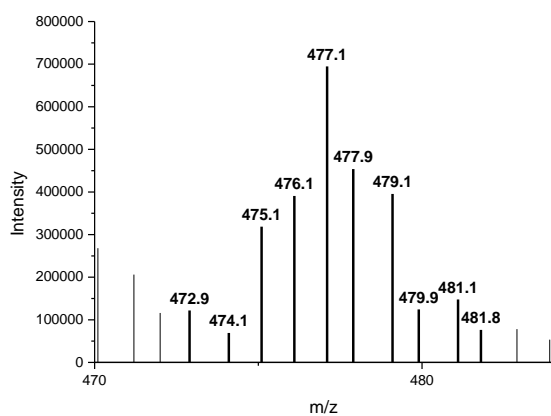

**Figure S11.** ESI-MS spectrum of **3**.

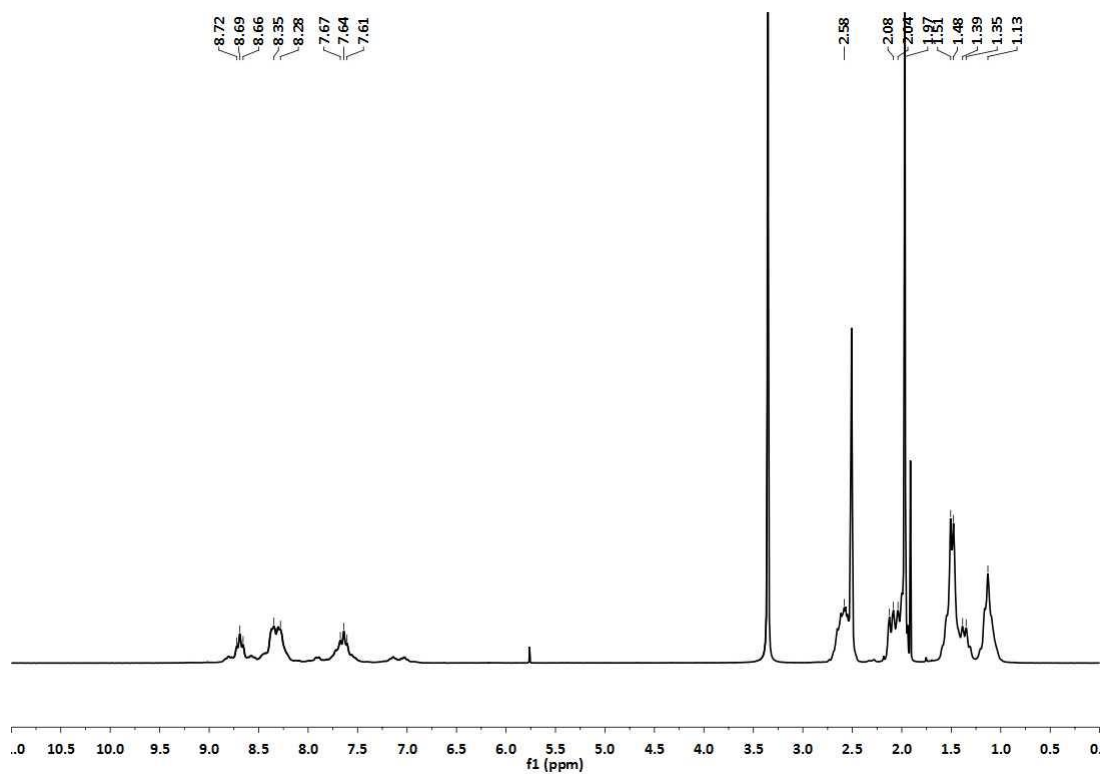

**Figure S12.**  $^1\text{H}$  NMR spectrum of **4** in  $\text{DMSO-}d_6$ .

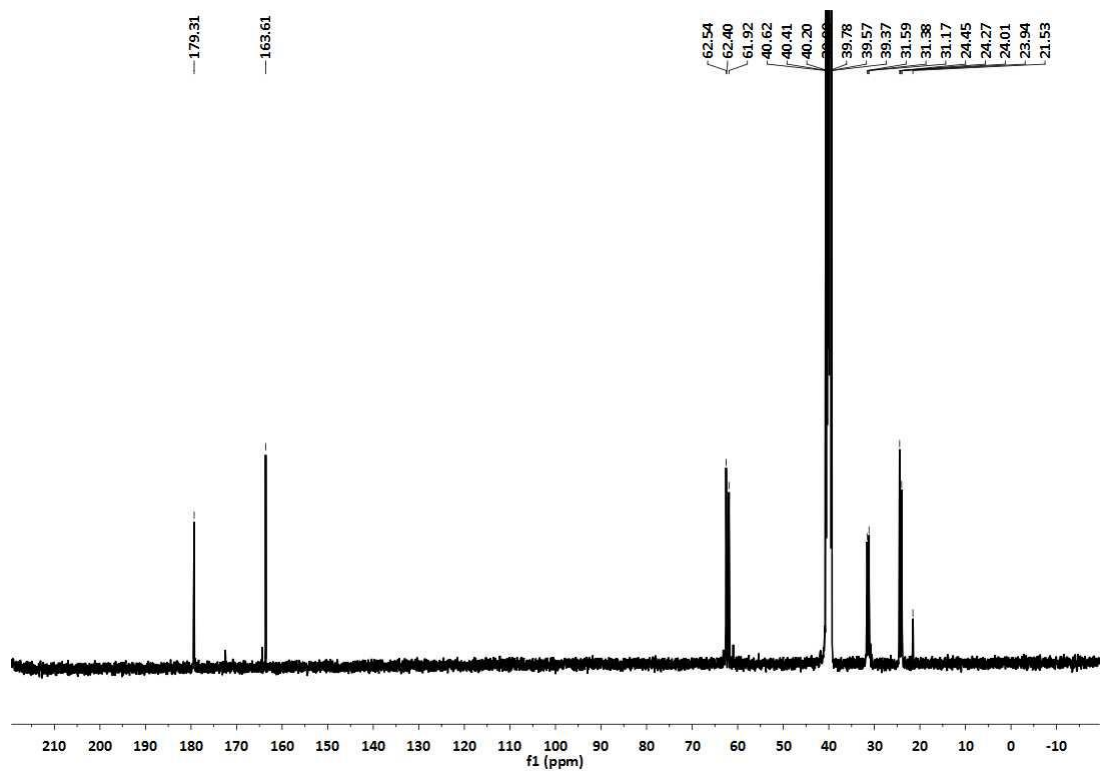

**Figure S13.** <sup>13</sup>C NMR spectrum of **4** in DMSO-*d*<sub>6</sub>.

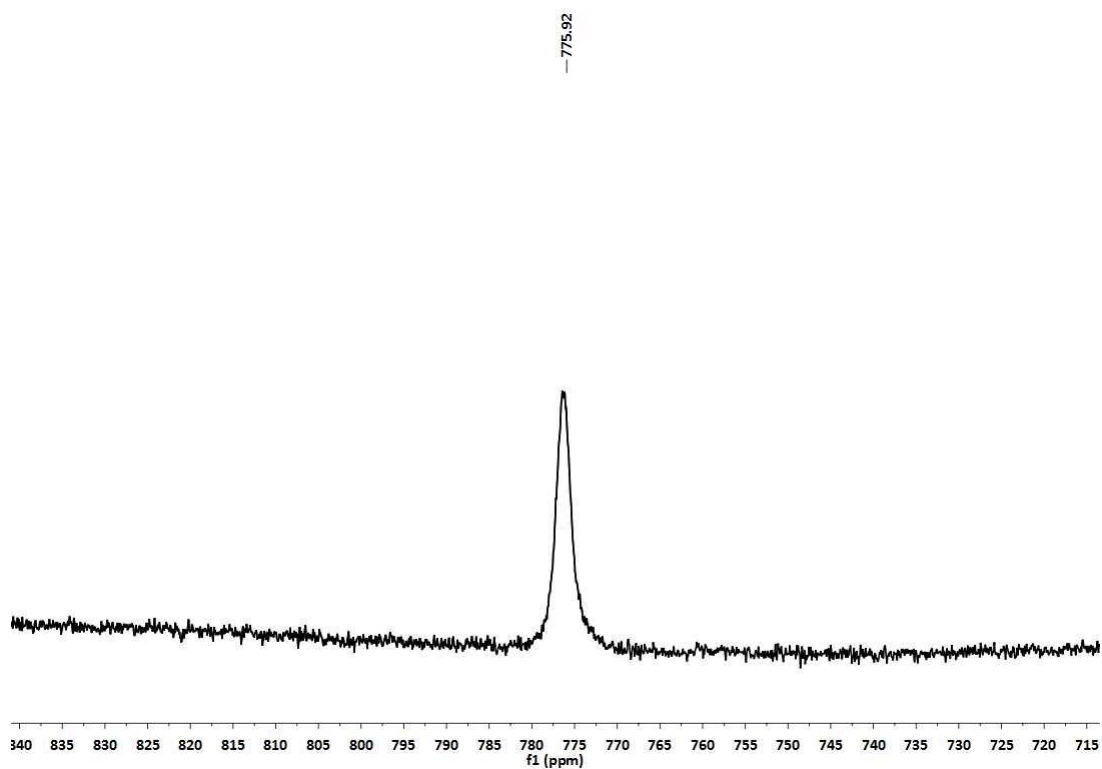

**Figure S14.** <sup>195</sup>Pt NMR spectrum of **4** in DMSO-*d*<sub>6</sub>.



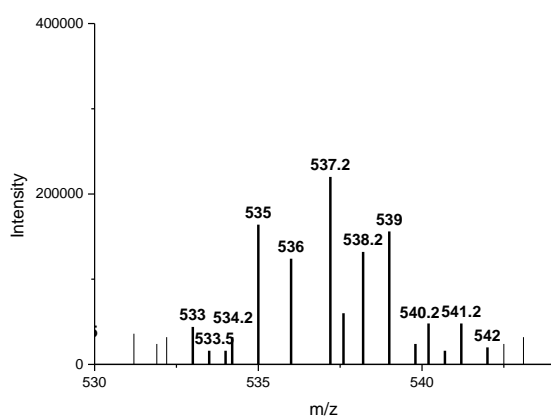

**Figure S15.** ESI-MS spectrum of **4**.

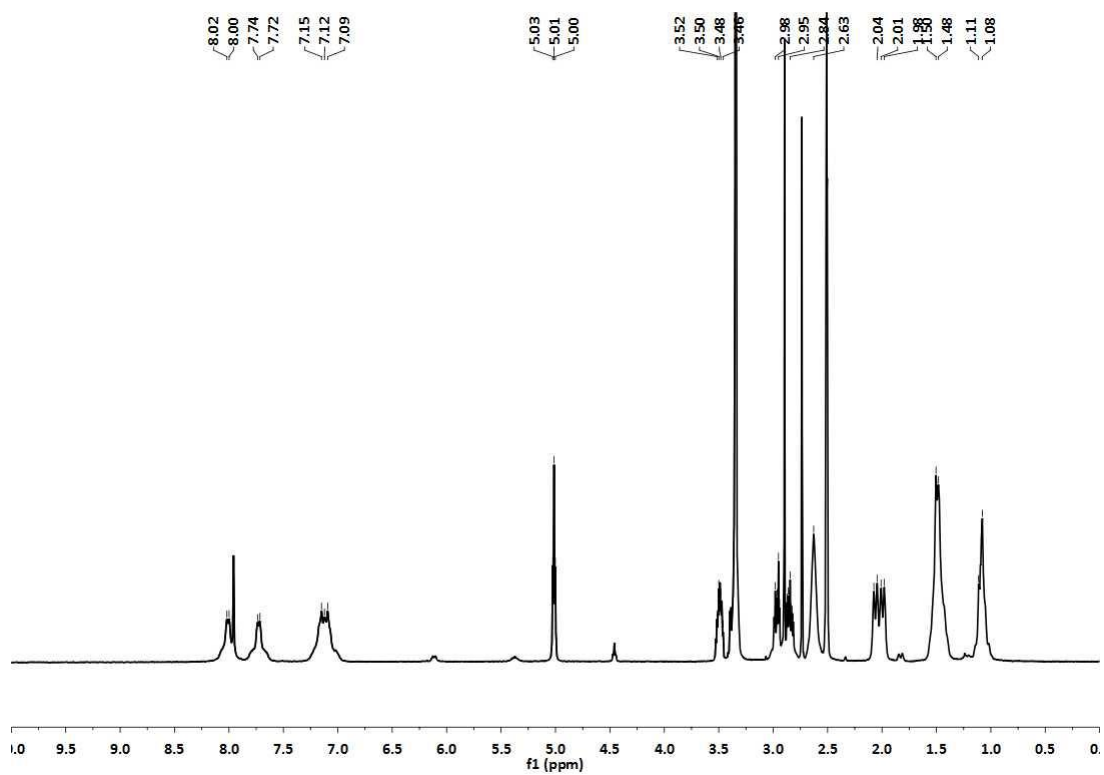

**Figure S16.** <sup>1</sup>H NMR spectrum of **5** in DMSO-d<sub>6</sub>.

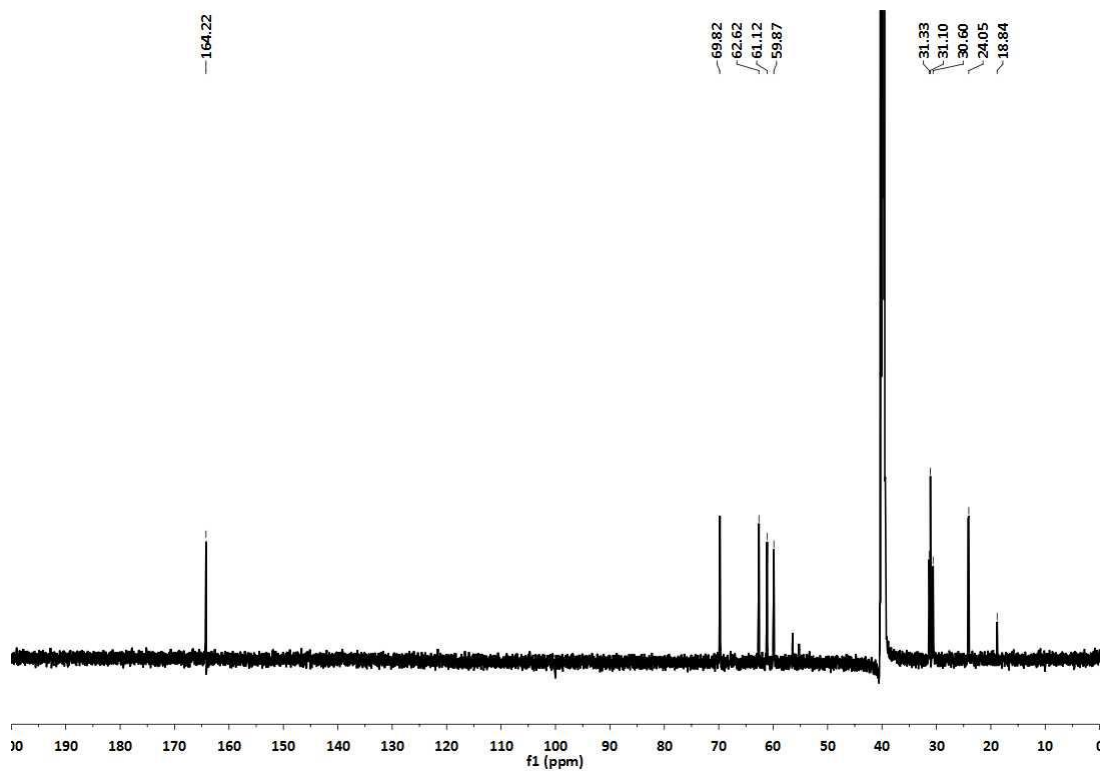

Figure S17.  $^{13}\text{C}$  NMR spectrum of **5** in  $\text{DMSO-}d_6$ .

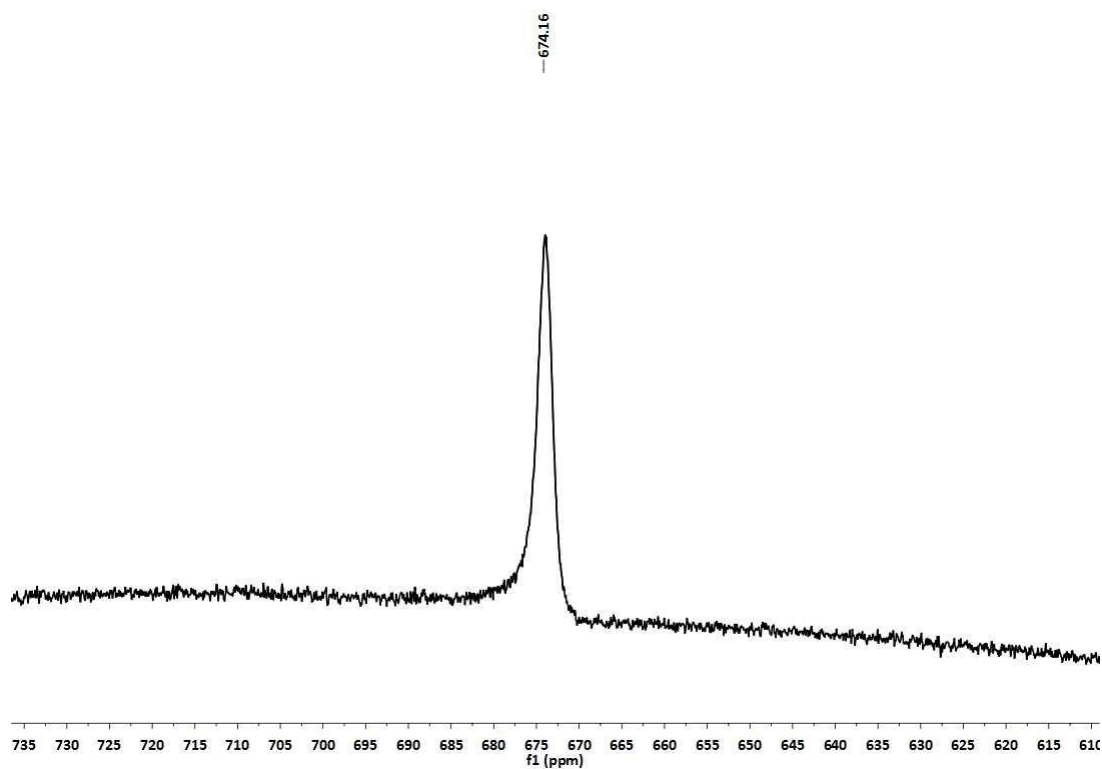

Figure S18.  $^{195}\text{Pt}$  NMR spectrum of **5** in  $\text{DMSO-}d_6$ .

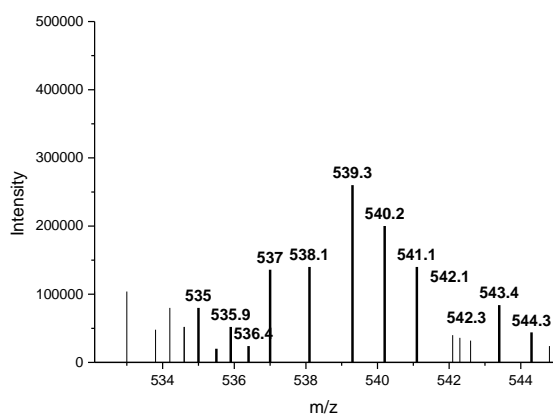

Figure S19. ESI-MS spectrum of 5.

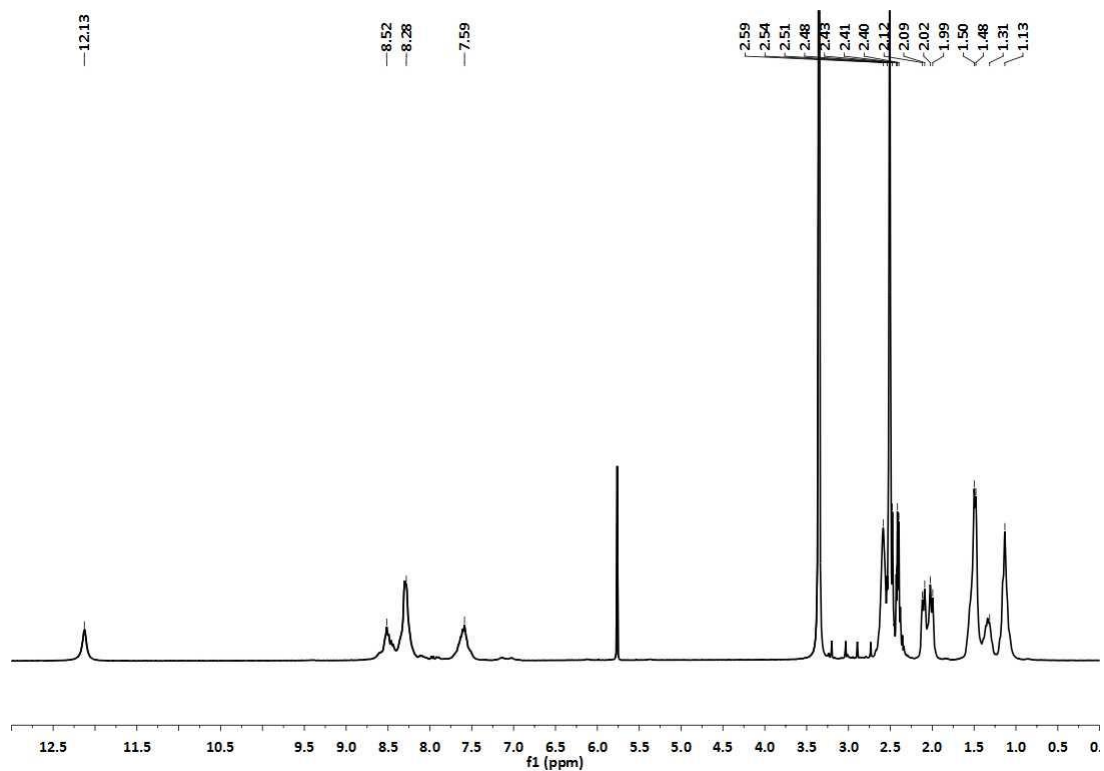

Figure S20. <sup>1</sup>H NMR spectrum of 6 in DMSO-*d*<sub>6</sub>.

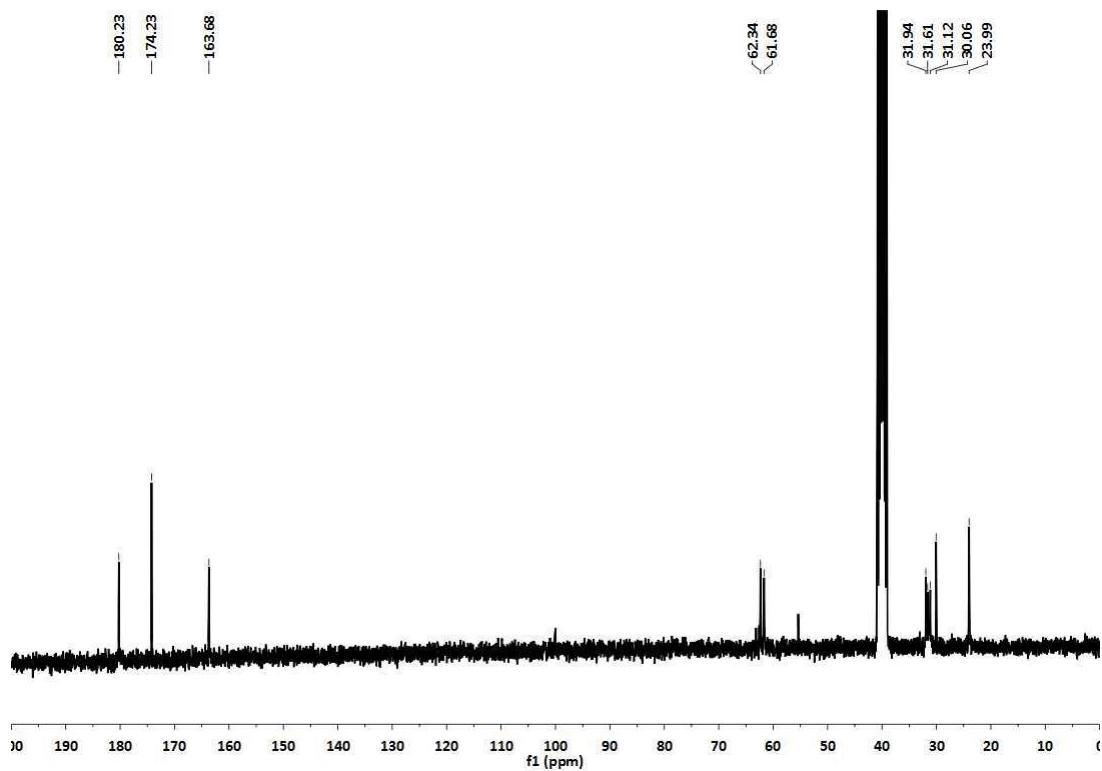

Figure S21. <sup>13</sup>C NMR spectrum of **6** in DMSO-*d*<sub>6</sub>.

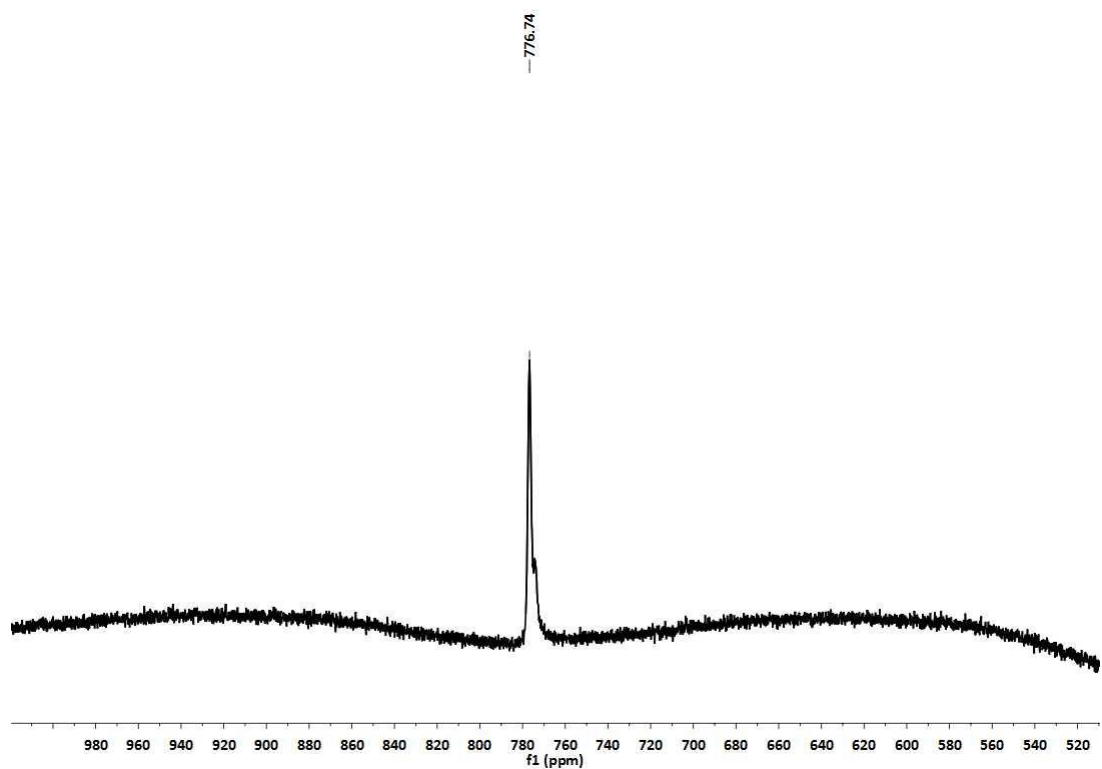

Figure S22. <sup>195</sup>Pt NMR spectrum of **6** in DMSO-*d*<sub>6</sub>.

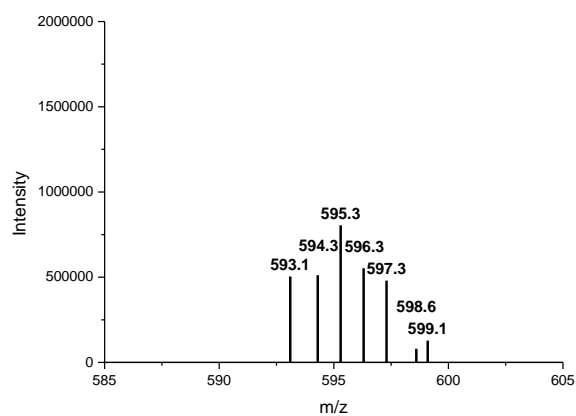

**Figure S23.** ESI-MS spectrum of **6**.

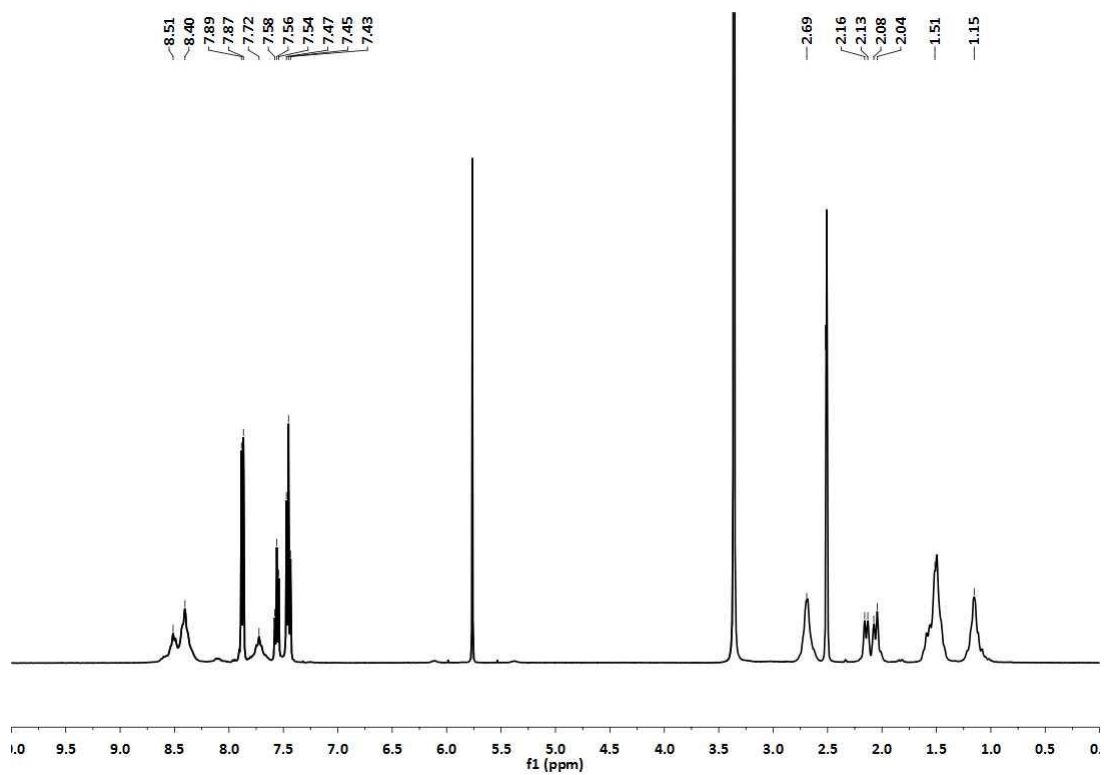

**Figure S24.**  $^1\text{H}$  NMR spectrum of **7** in  $\text{DMSO-}d_6$ .

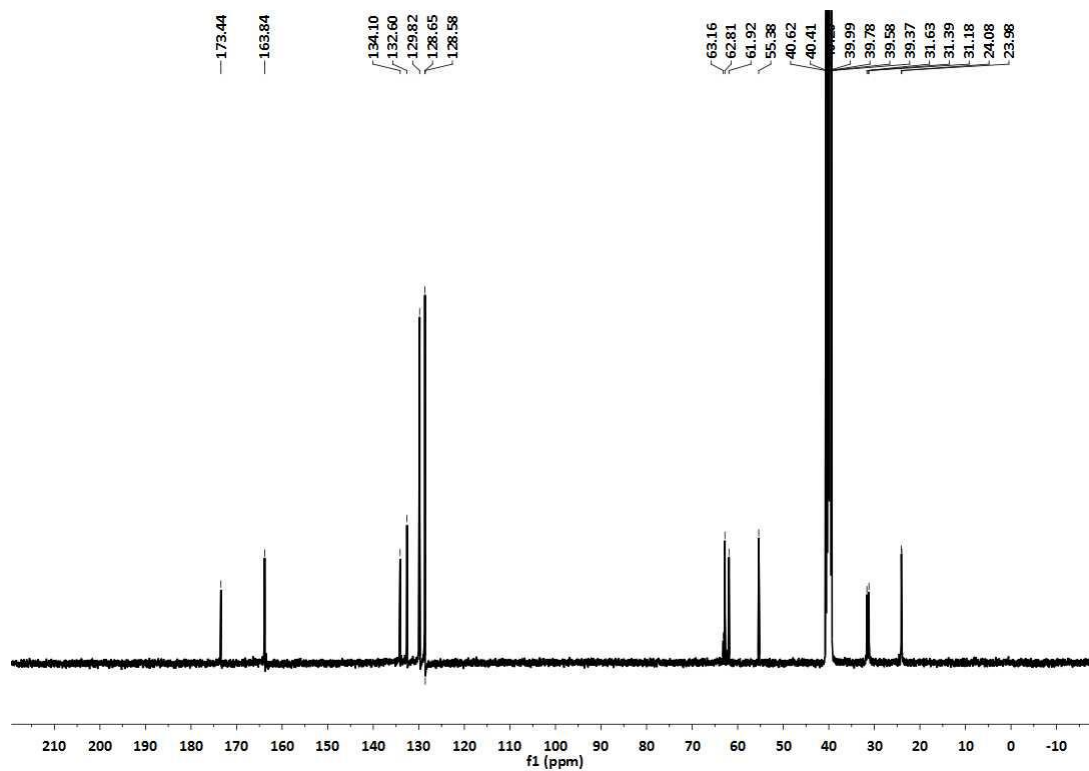

Figure S25.  $^{13}\text{C}$  NMR spectrum of **7** in  $\text{DMSO-}d_6$ .

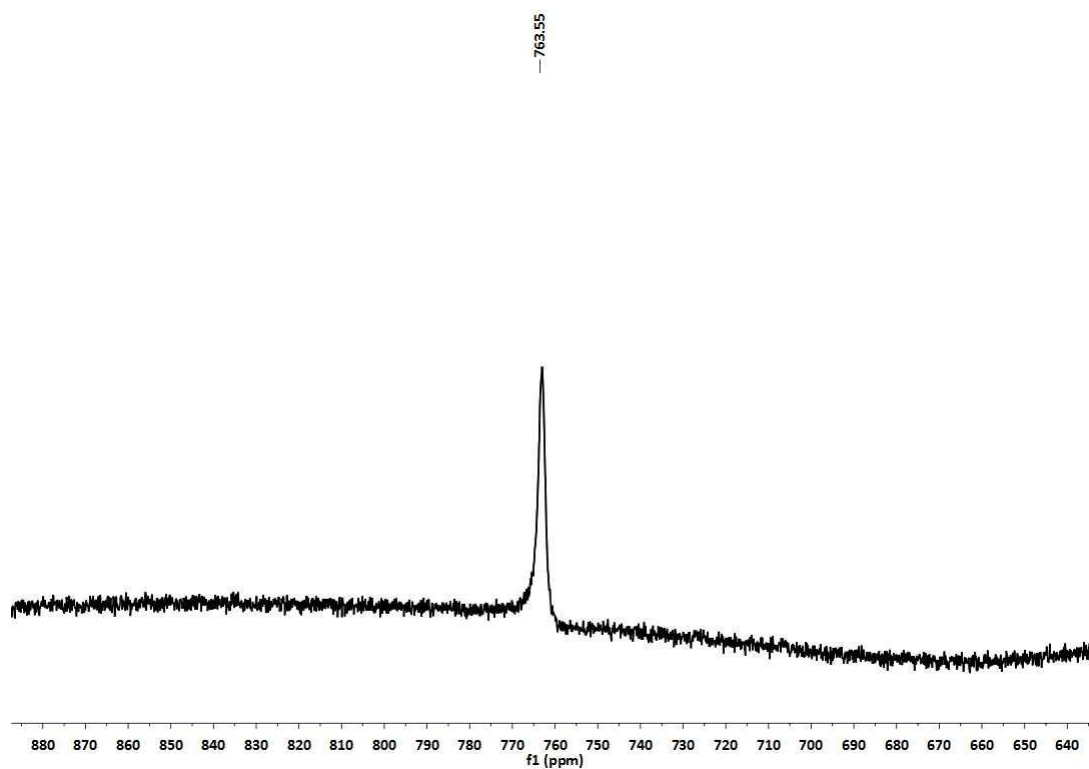

Figure S26.  $^{195}\text{Pt}$  NMR spectrum of **7** in  $\text{DMSO-}d_6$ .

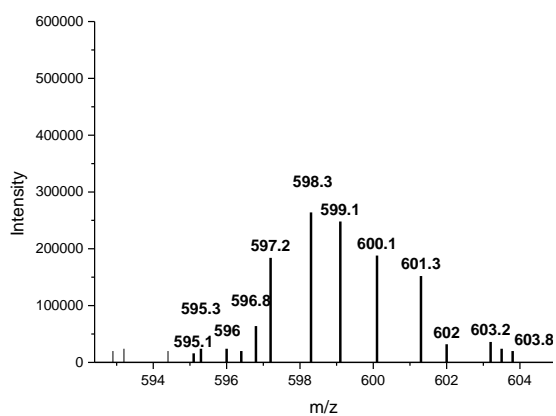

Figure S27. ESI-MS spectrum of 7.

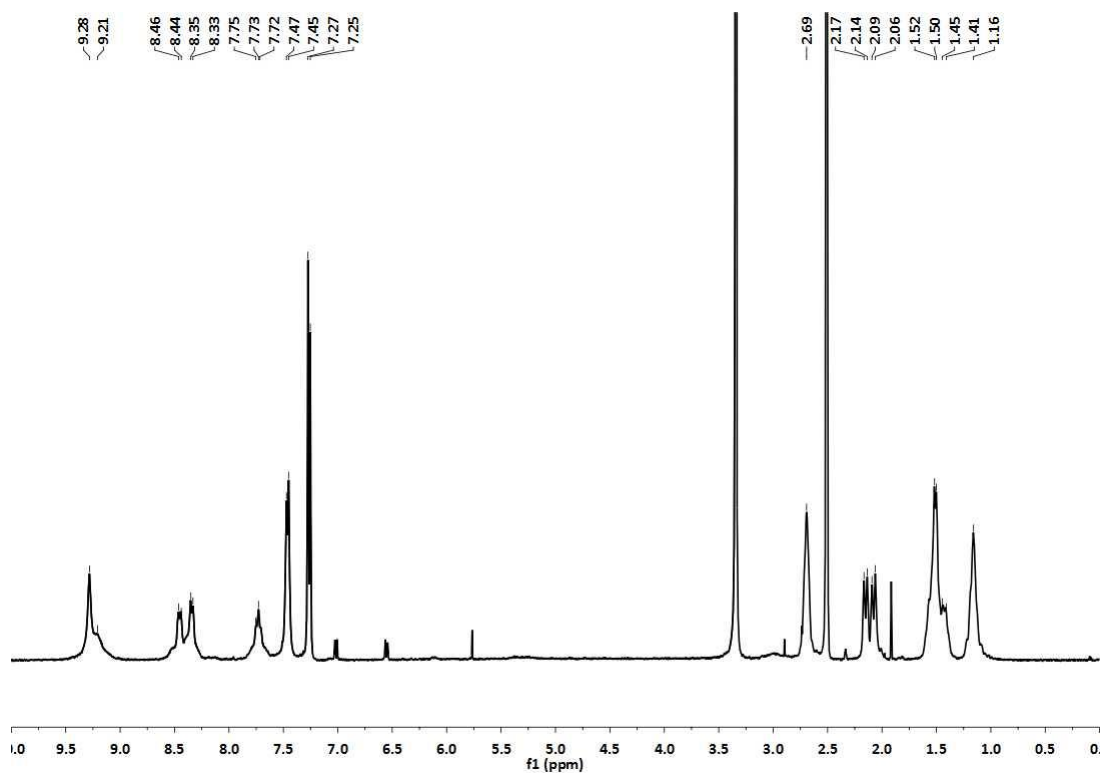

Figure S28. <sup>1</sup>H NMR spectrum of 8 in DMSO-*d*<sub>6</sub>.

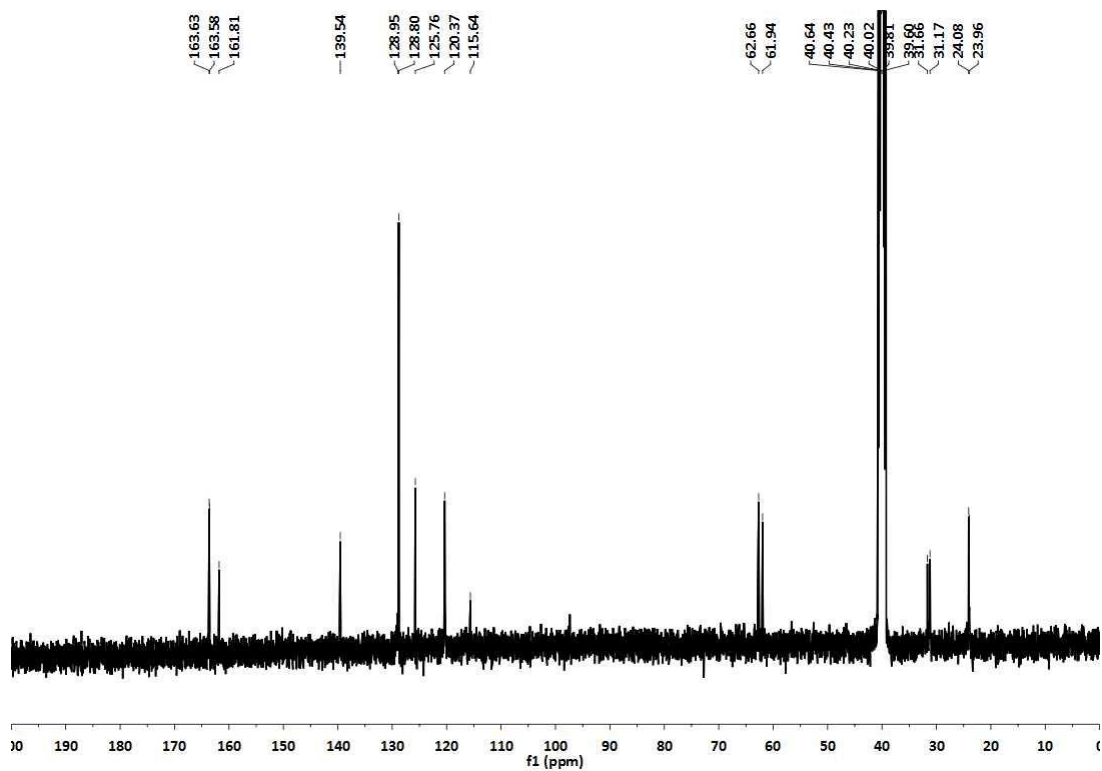

Figure S29.  $^{13}\text{C}$  NMR spectrum of **8** in  $\text{DMSO-}d_6$ .

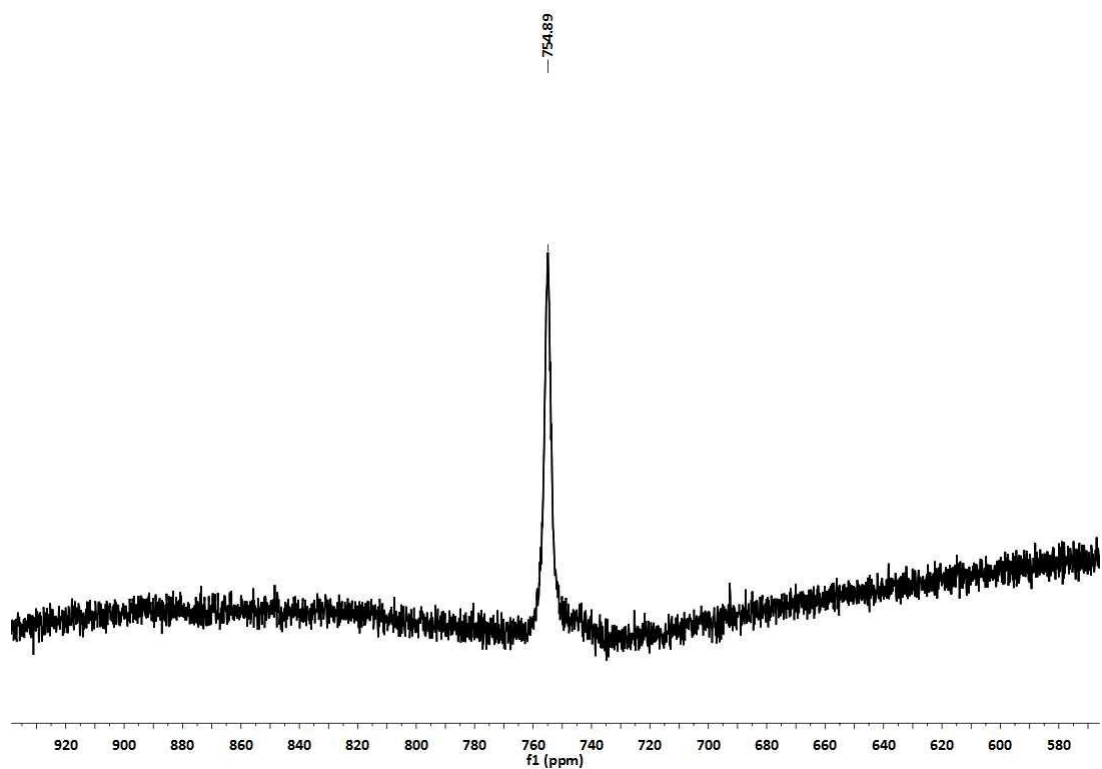

Figure S30.  $^{195}\text{Pt}$  NMR spectrum of **8** in  $\text{DMSO-}d_6$ .



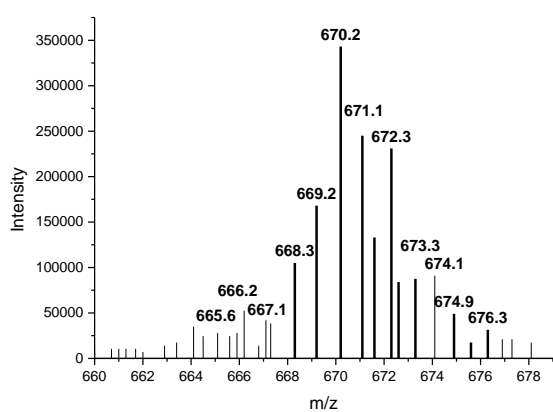

Figure S31. ESI-MS spectrum of 8.

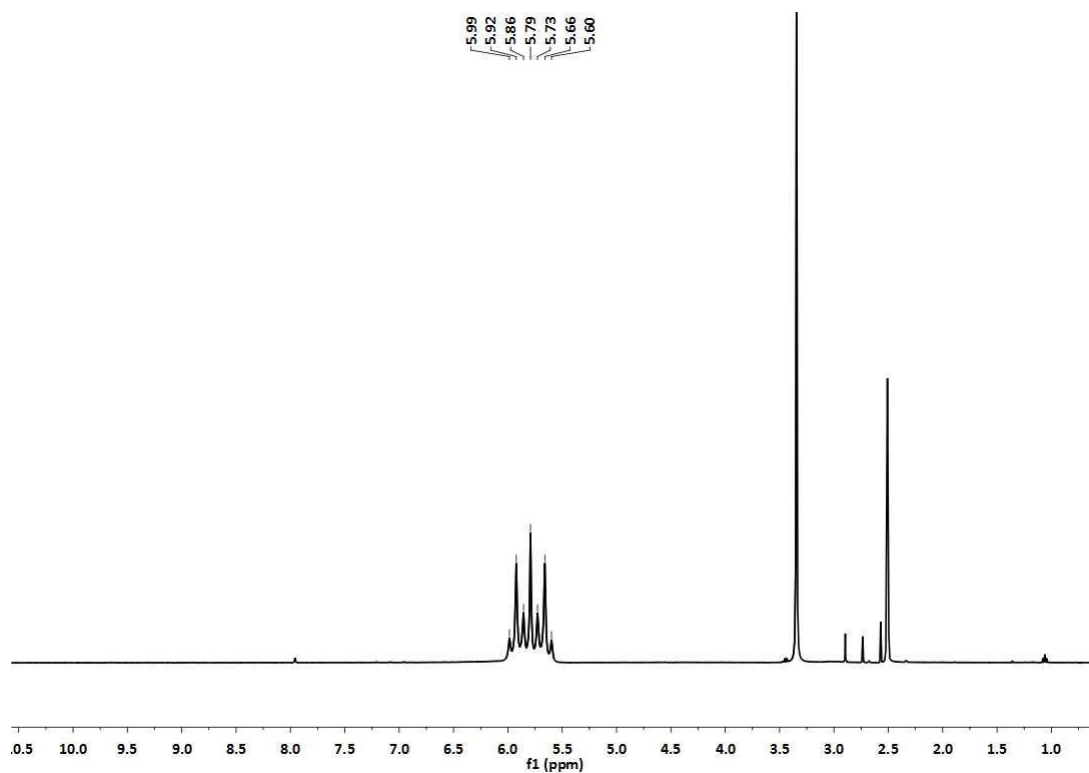

Figure S32. <sup>1</sup>H NMR spectrum of 9 in DMSO-d<sub>6</sub>.

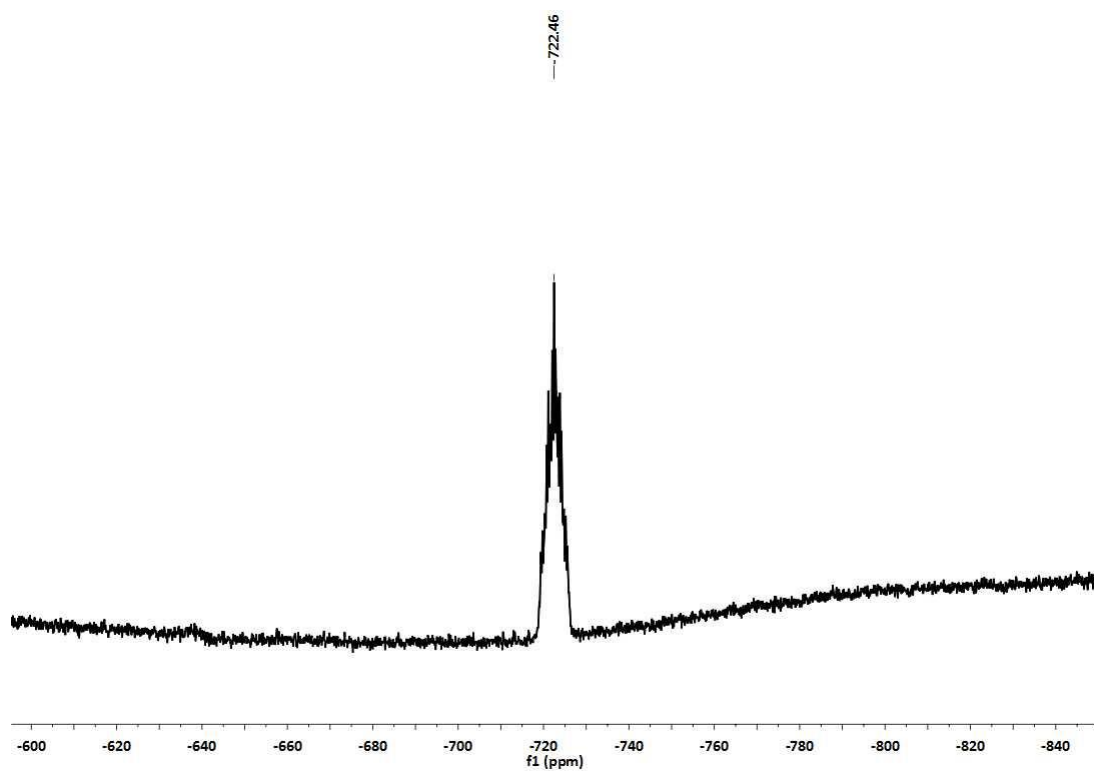

**Figure S33.**  $^{195}\text{Pt}$  NMR spectrum of **9** in  $\text{DMSO-}d_6$ .

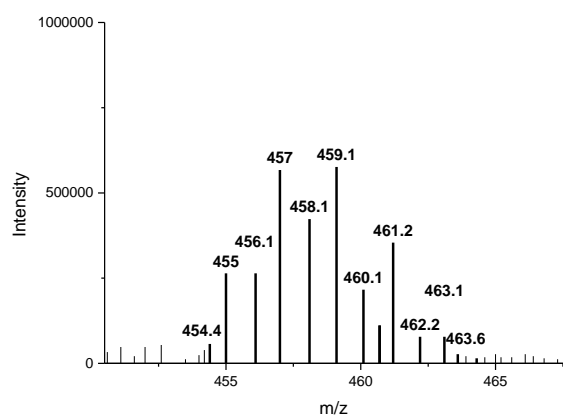

**Figure S34.** ESI-MS spectrum of **9**.

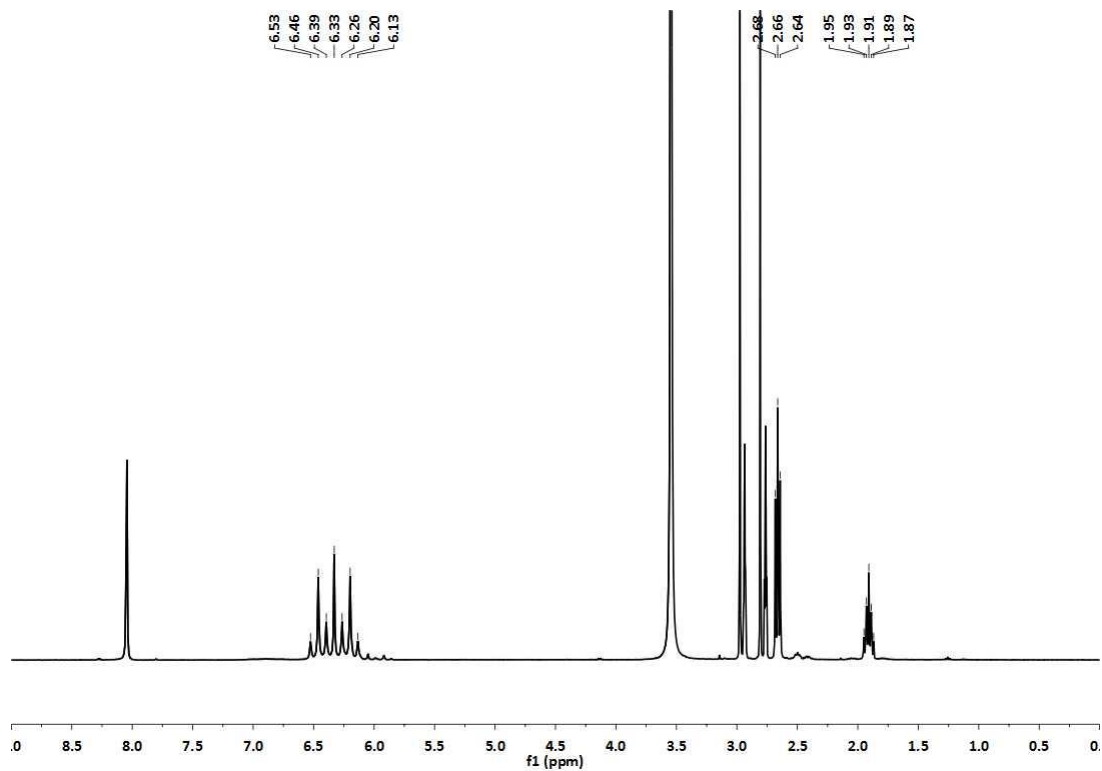

Figure S35.  $^1\text{H}$  NMR spectrum of **10** in  $\text{DMF-}d_7$ .

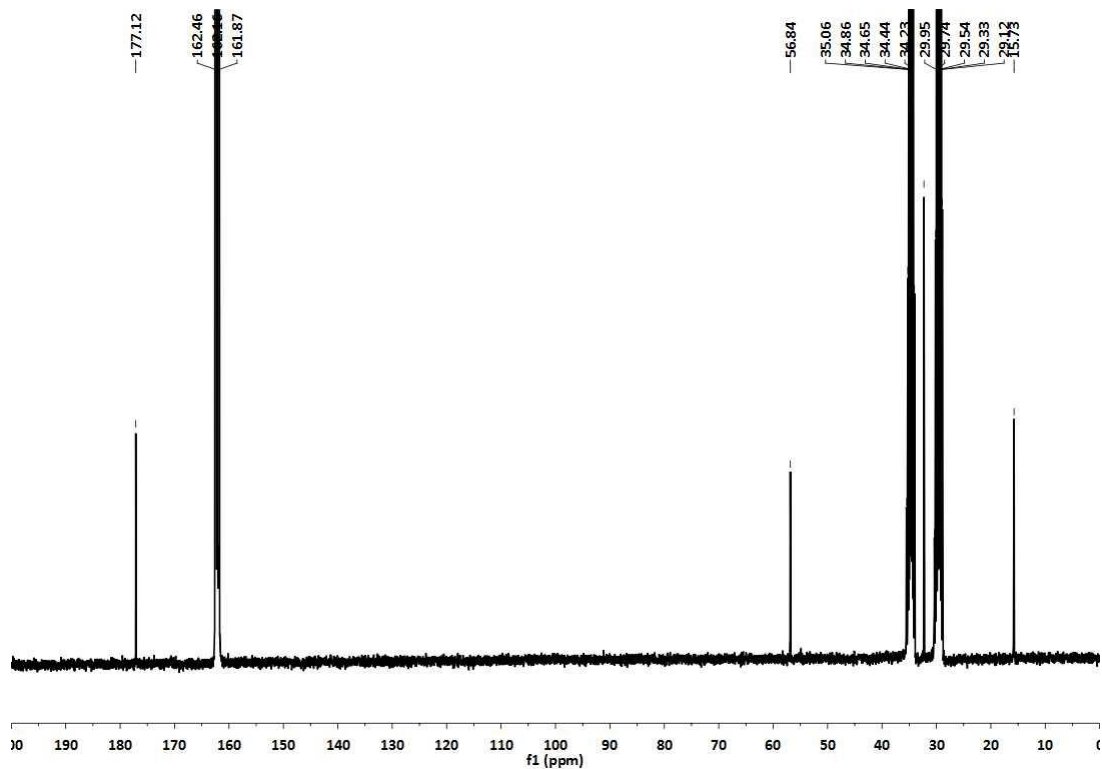

Figure S36.  $^{13}\text{C}$  NMR spectrum of **10** in  $\text{DMF-}d_7$ .

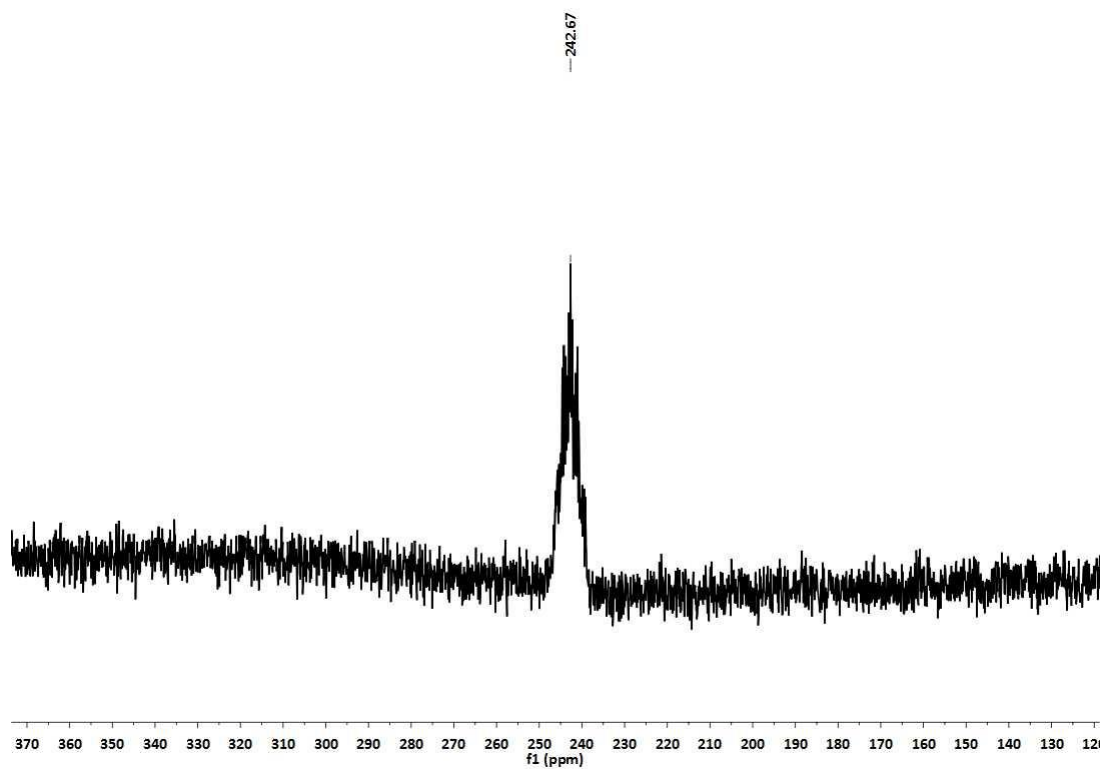

**Figure S37.**  $^{195}\text{Pt}$  NMR spectrum of **10** in  $\text{DMSO-}d_6$ .

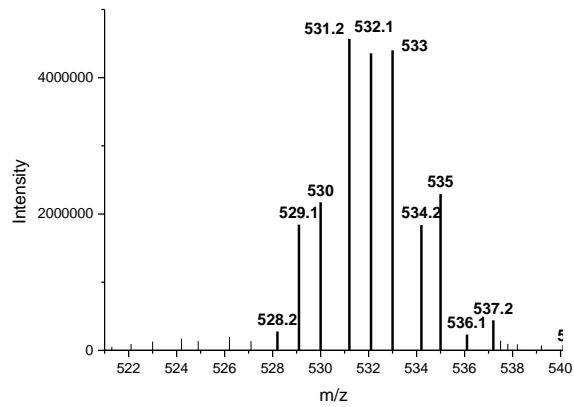

**Figure S38.** ESI-MS spectrum of **10**.

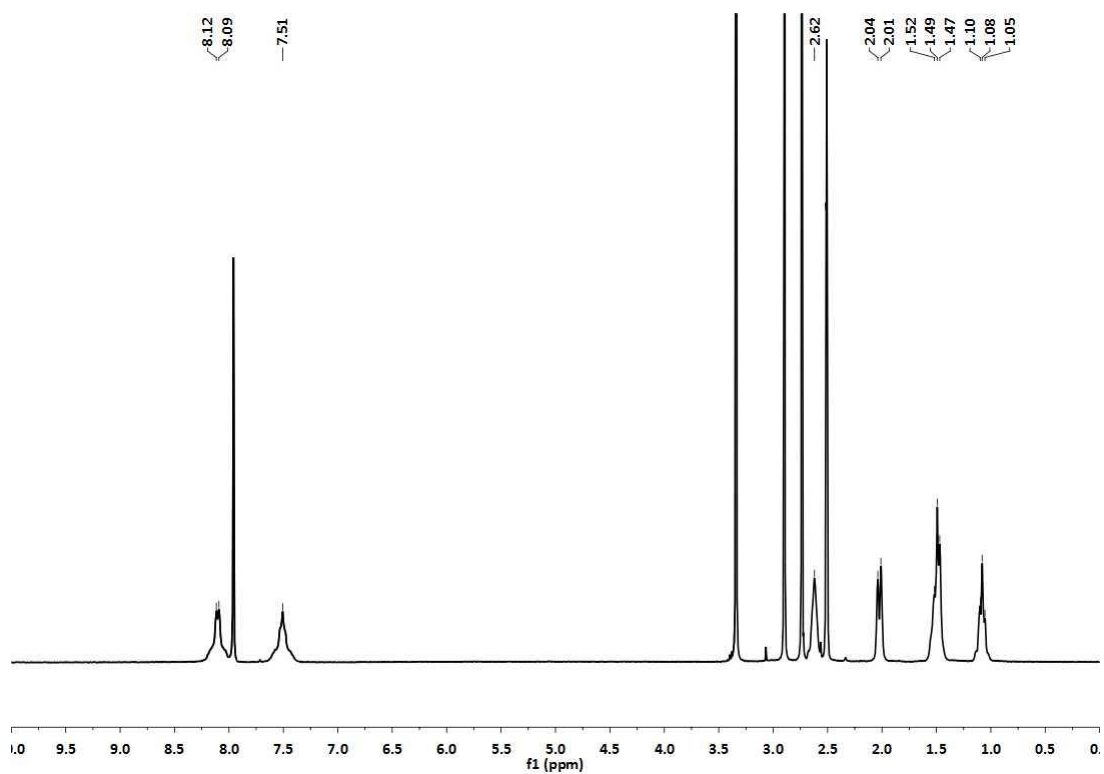

**Figure S39.**  $^1\text{H}$  NMR spectrum of **11** in  $\text{DMSO-}d_6$ .

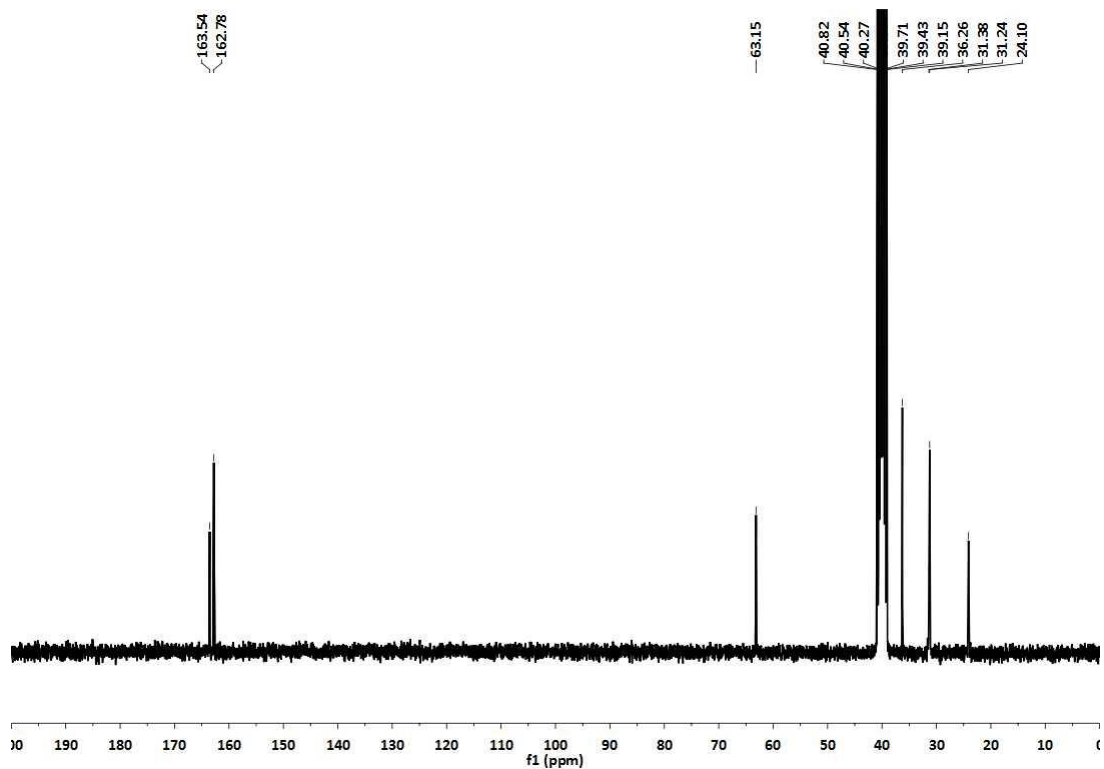

**Figure S40.**  $^{13}\text{C}$  NMR spectrum of **11** in  $\text{DMSO-}d_6$ .

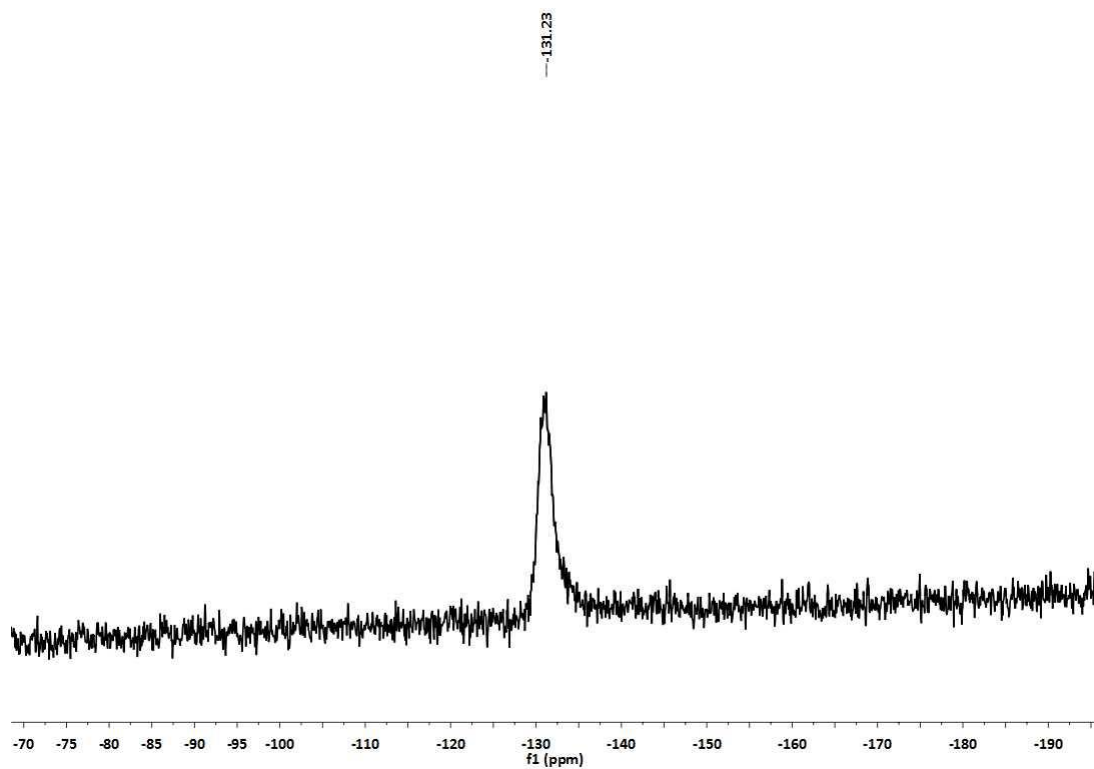

**Figure S41.**  $^{195}\text{Pt}$  NMR spectrum of **11** in  $\text{DMSO-}d_6$ .

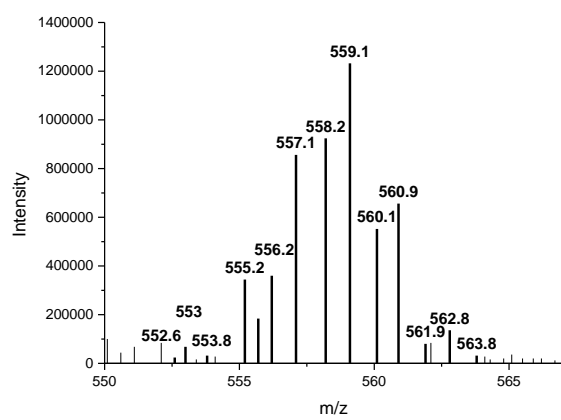

**Figure S42.** ESI-MS spectrum of **11**.

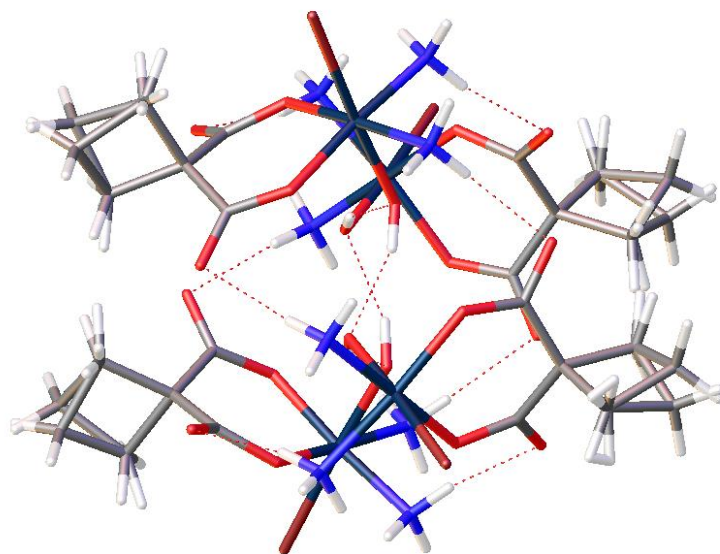

**Figure S43.** Packing diagram of compound **2** shows the intermolecular interactions in the crystal. The hydrogen bonds are indicated by red dot lines. DMF solvents were omitted for clarity.

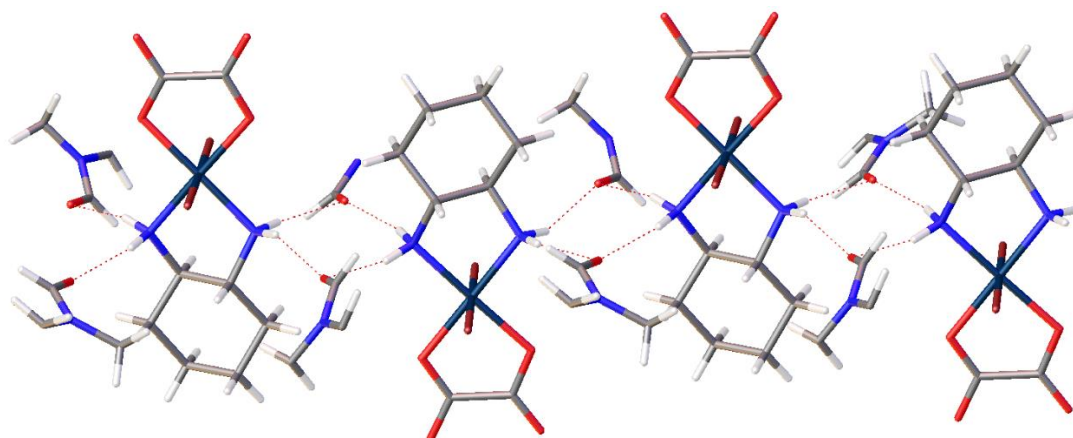

**Figure S44.** Packing diagram of compound **11** shows the intermolecular interactions in the crystal. The hydrogen bonds are indicated by red dot lines.

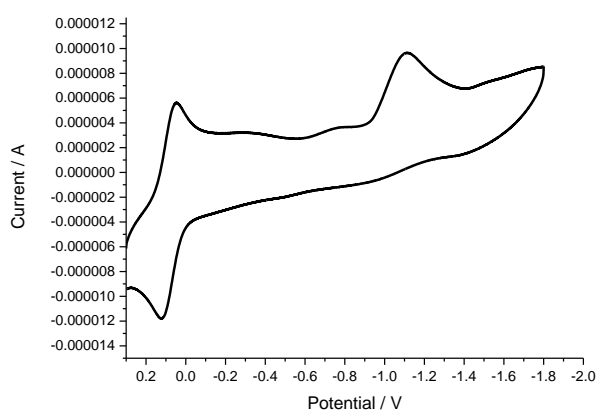

**Figure S45.** Cyclic voltammetry of compound **2** with ferrocene as an internal reference

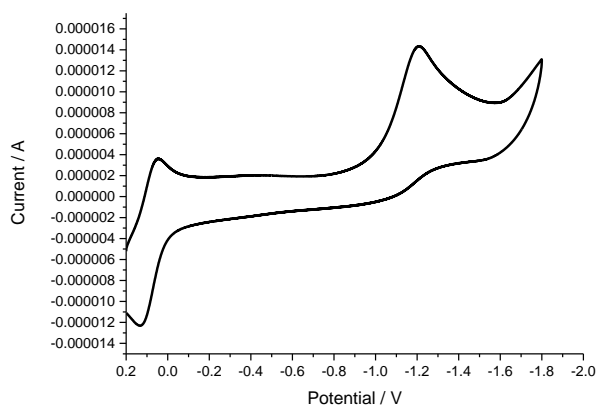

**Figure S46.** Cyclic voltammetry of compound **3** with ferrocene as an internal reference

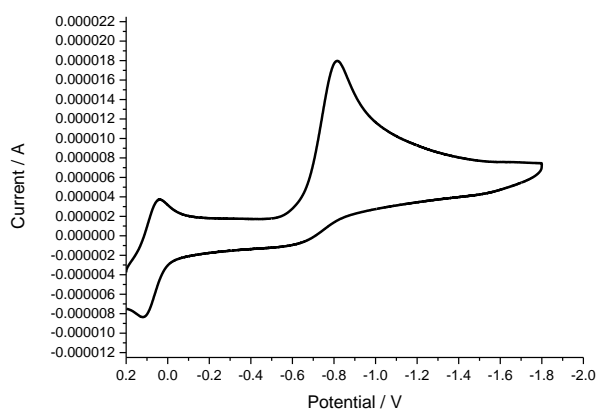

**Figure S47.** Cyclic voltammetry of compound **6** with ferrocene as an internal reference



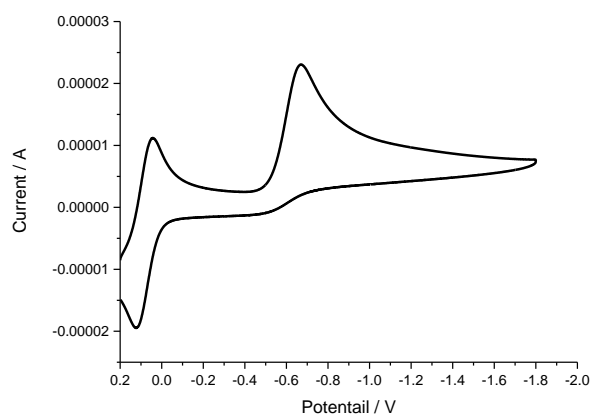

**Figure S48.** Cyclic voltammety of compound **9** with ferrocene as an internal reference

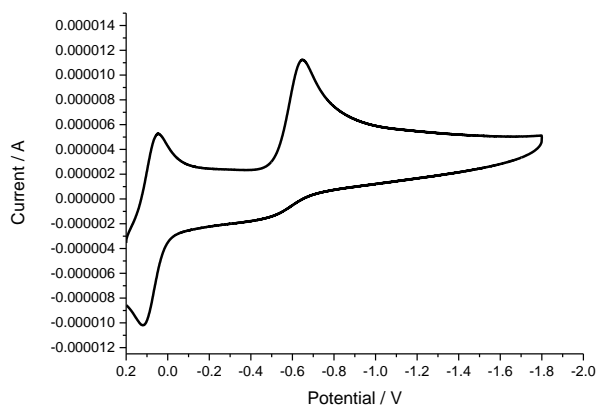

**Figure S49.** Cyclic voltammety of compound **10** with ferrocene as an internal reference

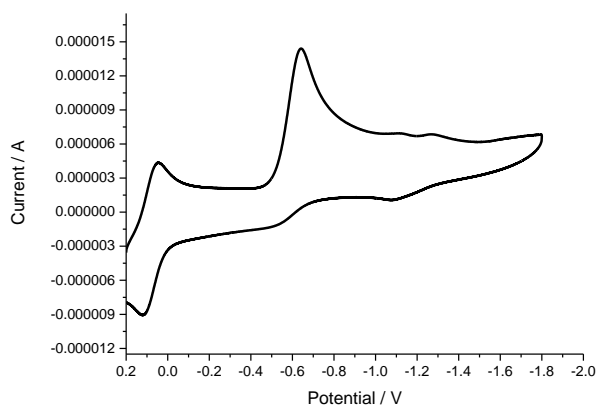

**Figure S50.** Cyclic voltammety of compound **11** with ferrocene as an internal reference

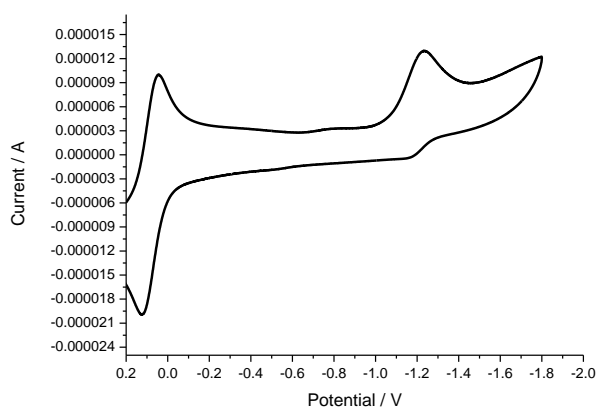

**Figure S51.** Cyclic voltammety of compound **13** with ferrocene as an internal reference

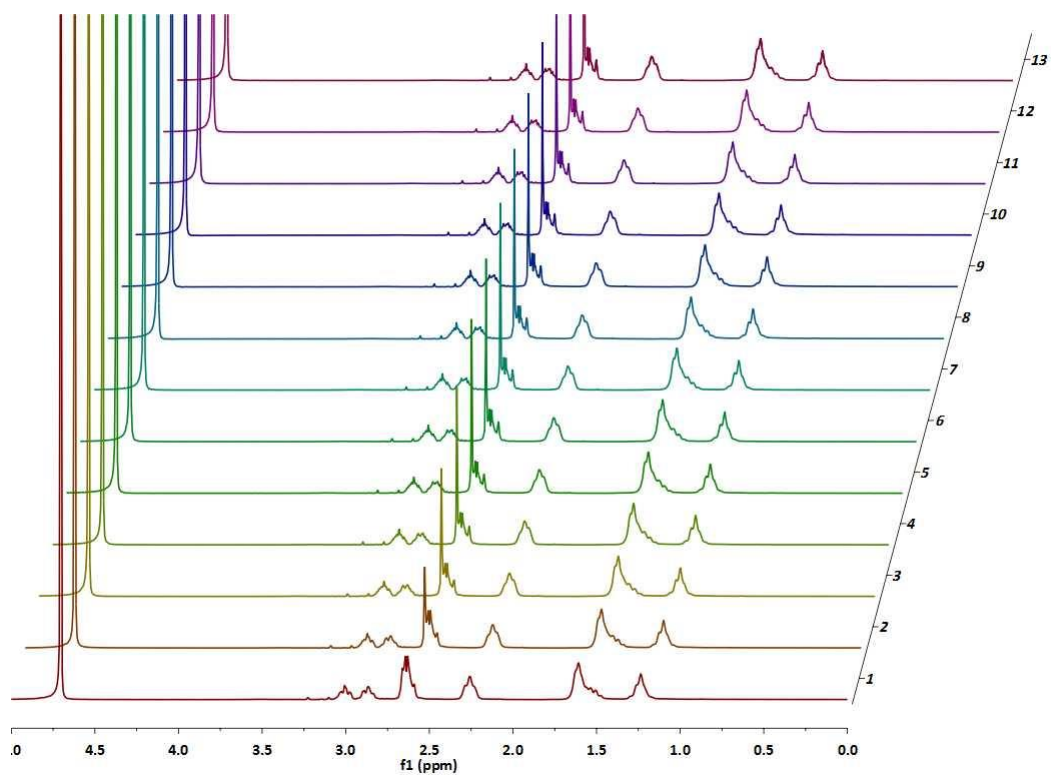

**Figure S52.** Hydrolysis of compound **6** in D<sub>2</sub>O. Compound **6** was dissolved in D<sub>2</sub>O and its stability was monitored by <sup>1</sup>H NMR every 30 min.

**Table S1.** Crystal data and structure refinement for compounds **2** and **11**

|                                             | <b>2</b>                                                          | <b>11</b>                                                                        |
|---------------------------------------------|-------------------------------------------------------------------|----------------------------------------------------------------------------------|
| Identification code                         | <b>2</b>                                                          | <b>11</b>                                                                        |
| Empirical formula                           | C <sub>9</sub> H <sub>20</sub> BrN <sub>3</sub> O <sub>6</sub> Pt | C <sub>14</sub> H <sub>28</sub> Br <sub>2</sub> N <sub>4</sub> O <sub>6</sub> Pt |
| Formula weight                              | 541.28                                                            | 703.28                                                                           |
| Temperature/K                               | 193(2)                                                            | 193(2)                                                                           |
| Crystal system                              | tetragonal                                                        | orthorhombic                                                                     |
| Space group                                 | I4 <sub>1</sub> /amd                                              | P2 <sub>1</sub> 2 <sub>1</sub> 2 <sub>1</sub>                                    |
| a/Å                                         | 16.87350(10)                                                      | 9.9096(3)                                                                        |
| b/Å                                         | 16.87350(10)                                                      | 13.3318(4)                                                                       |
| c/Å                                         | 24.1091(2)                                                        | 17.2606(6)                                                                       |
| α/°                                         | 90                                                                | 90                                                                               |
| β/°                                         | 90                                                                | 90                                                                               |
| γ/°                                         | 90                                                                | 90                                                                               |
| Volume/Å <sup>3</sup>                       | 6864.22(8)                                                        | 2280.35(13)                                                                      |
| Z                                           | 16                                                                | 4                                                                                |
| ρ <sub>calc</sub> /cm <sup>3</sup>          | 2.095                                                             | 2.049                                                                            |
| μ/mm <sup>-1</sup>                          | 18.266                                                            | 15.926                                                                           |
| F(000)                                      | 4096                                                              | 1344                                                                             |
| Crystal size/mm <sup>3</sup>                | 0.36 × 0.25 × 0.19                                                | 0.24 × 0.21 × 0.02                                                               |
| Radiation                                   | CuKα (λ = 1.54178)                                                | CuKα (λ = 1.54178)                                                               |
| 2θ range for data collection/°              | 6.4 to 143.38                                                     | 8.38 to 134                                                                      |
| Index ranges                                | -20 ≤ h ≤ 19, -17 ≤ k ≤ 14, -29 ≤ l ≤ 26                          | -11 ≤ h ≤ 11, -15 ≤ k ≤ 15, -20 ≤ l ≤ 15                                         |
| Reflections collected                       | 6681                                                              | 11661                                                                            |
| Independent reflections                     | 1769 [R <sub>int</sub> = 0.0212]                                  | 3873 [R <sub>int</sub> = 0.0598]                                                 |
| Data/restraints/parameters                  | 1769/16/131                                                       | 3873/24/268                                                                      |
| Goodness-of-fit on F <sup>2</sup>           | 1.158                                                             | 1.069                                                                            |
| Final R indexes [I ≥ 2σ (I)]                | R <sub>1</sub> = 0.0365, wR <sub>2</sub> = 0.1124                 | R <sub>1</sub> = 0.0336, wR <sub>2</sub> = 0.0894                                |
| Final R indexes [all data]                  | R <sub>1</sub> = 0.0384, wR <sub>2</sub> = 0.1144                 | R <sub>1</sub> = 0.0352, wR <sub>2</sub> = 0.0908                                |
| Largest diff. peak/hole / e Å <sup>-3</sup> | 1.08/-1.48                                                        | 1.52/-1.35                                                                       |

**Table S2.** Selected bond lengths (Å) and angles (°) for compound **2**

| <b>Bond lengths</b> |            | <b>Bond angles</b> |            |
|---------------------|------------|--------------------|------------|
| <b>Pt-Br1</b>       | 2.4675(12) | O3-Pt-O1           | 87.2(6)    |
| <b>Pt-O1</b>        | 1.988(5)   | O3-Pt-N1           | 85.5(8)    |
| <b>Pt-O2</b>        | 2.014(17)  | O1-Pt-N1           | 83.3(6)    |
| <b>Pt-O3</b>        | 1.986(18)  | O3-Pt-O2           | 95.5(3)    |
| <b>Pt-N1</b>        | 2.005(17)  | O1-Pt-O2           | 89.1(6)    |
| <b>Pt-N2</b>        | 2.037(16)  | N1-Pt-O2           | 172.3(8)   |
|                     |            | O3-PtN-2           | 177.1(8)   |
|                     |            | O1-Pt-N2           | 91.0(6)    |
|                     |            | N1-Pt-N2           | 92.1(6)    |
|                     |            | O2-Pt-N2           | 86.7(8)    |
|                     |            | O3-Pt-Br1          | 92.1(6)    |
|                     |            | O1-Pt-Br1          | 175.91(12) |
|                     |            | N1-Pt-Br1          | 92.6(6)    |
|                     |            | O2-Pt-Br1          | 95.0(6)    |
|                     |            | N2-Pt-Br1          | 89.6(6)    |

**Tables S3.** Selected bond lengths (Å) and angles (°) for compound **11**

| <b>Bond lengths</b> |           | <b>Bond angles</b> |           |
|---------------------|-----------|--------------------|-----------|
| <b>Pt-Br1</b>       | 2.4590(6) | N2-Pt-O2           | 95.4(2)   |
| <b>Pt-Br2</b>       | 2.4415(6) | N2-Pt-N1           | 83.42(18) |
| <b>Pt-O1</b>        | 2.050(6)  | O2-Pt-N1           | 178.7(2)  |
| <b>Pt-O2</b>        | 2.044(6)  | N2-Pt-O1           | 179.0(2)  |
| <b>Pt-N1</b>        | 2.050(5)  | O2-Pt-O1           | 84.8(2)   |
| <b>Pt-N2</b>        | 2.033(5)  | N1-Pt-O1           | 96.4(3)   |
|                     |           | N2-Pt-Br2          | 88.78(16) |
|                     |           | O2-Pt-Br2          | 89.04(17) |
|                     |           | N1-Pt-Br2          | 91.60(16) |
|                     |           | O1-Pt-Br2          | 90.28(17) |
|                     |           | N2-Pt-Br1          | 92.33(15) |
|                     |           | O2-Pt-Br1          | 90.21(17) |
|                     |           | N1-Pt-Br1          | 89.18(16) |
|                     |           | O1-Pt-Br1          | 88.61(17) |
|                     |           | Br2-Pt-Br1         | 178.71(2) |
